# Supplementary material for: Betulinic Acid-Nitrogen Heterocyclic Derivatives: Design, Synthesis, and Antitumor Evaluation in Vitro
Source: MDPI journal article supplement (doi:10.3390/molecules25040948), 2020-02-20

Supplementary Material for compounds:

### Compound 3

$^1\text{H}$ -NMR spectra of Compound 3

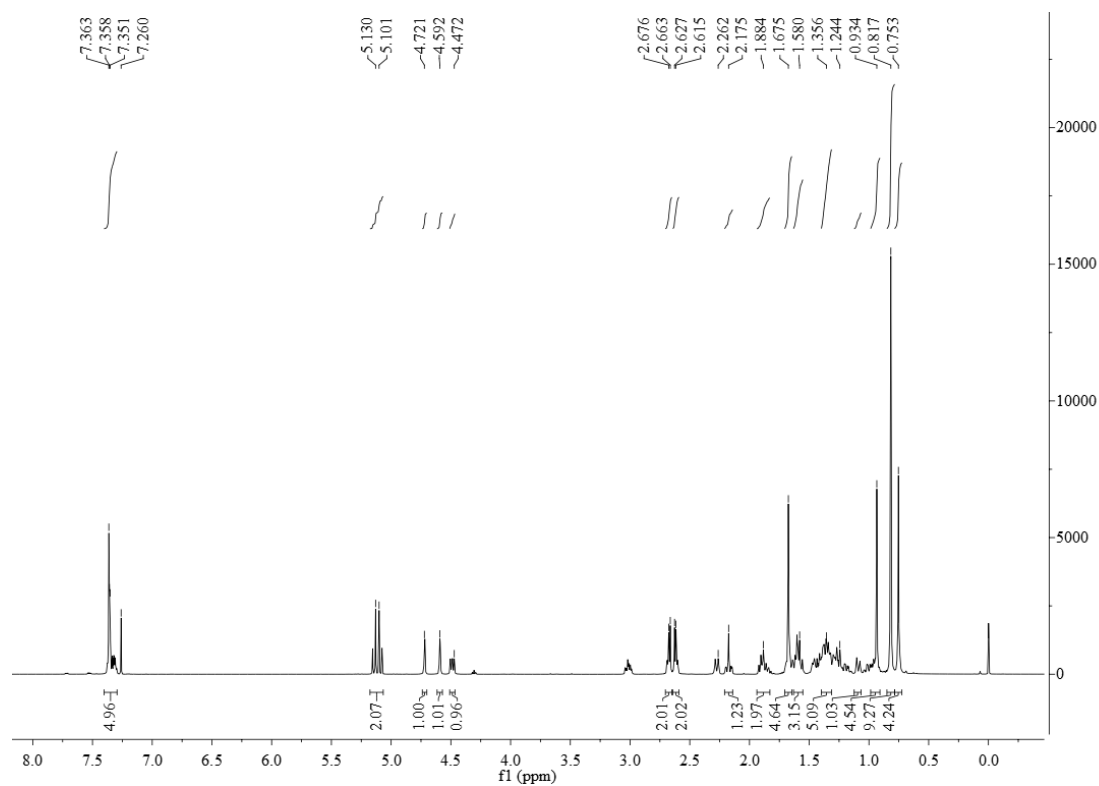

$^{13}\text{C}$ -NMR spectra of Compound 3

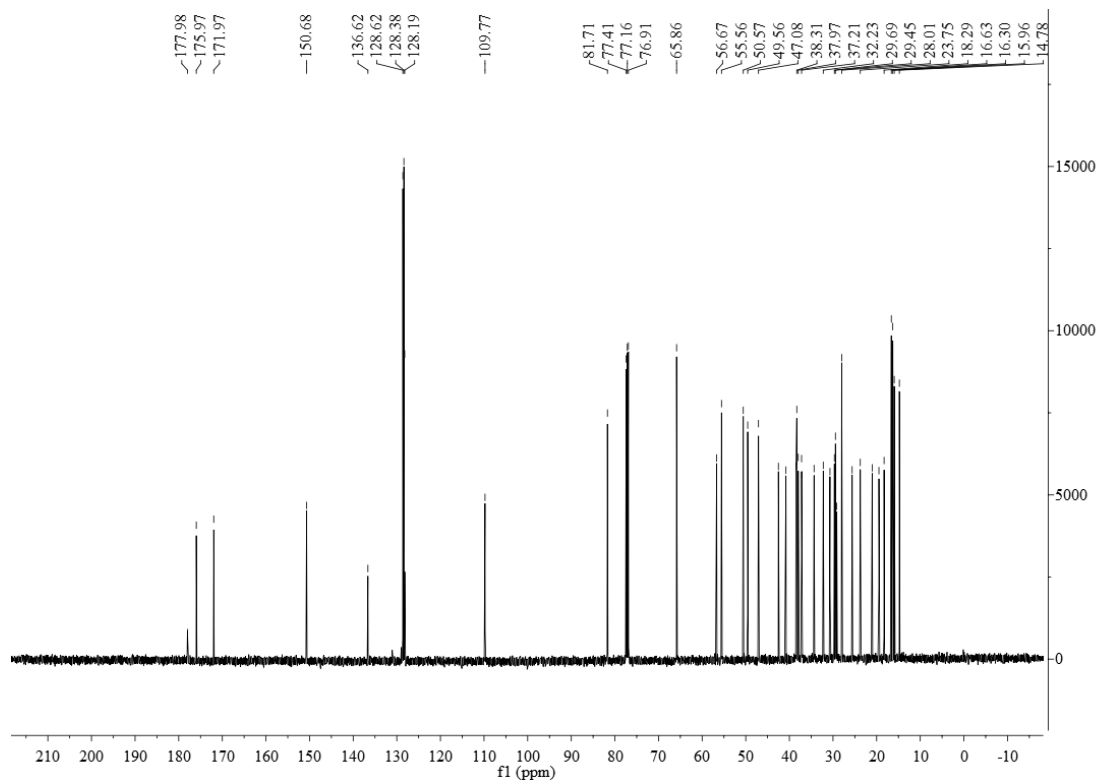

## Compound 4a

### $^1\text{H}$ -NMR spectra of Compound 4a

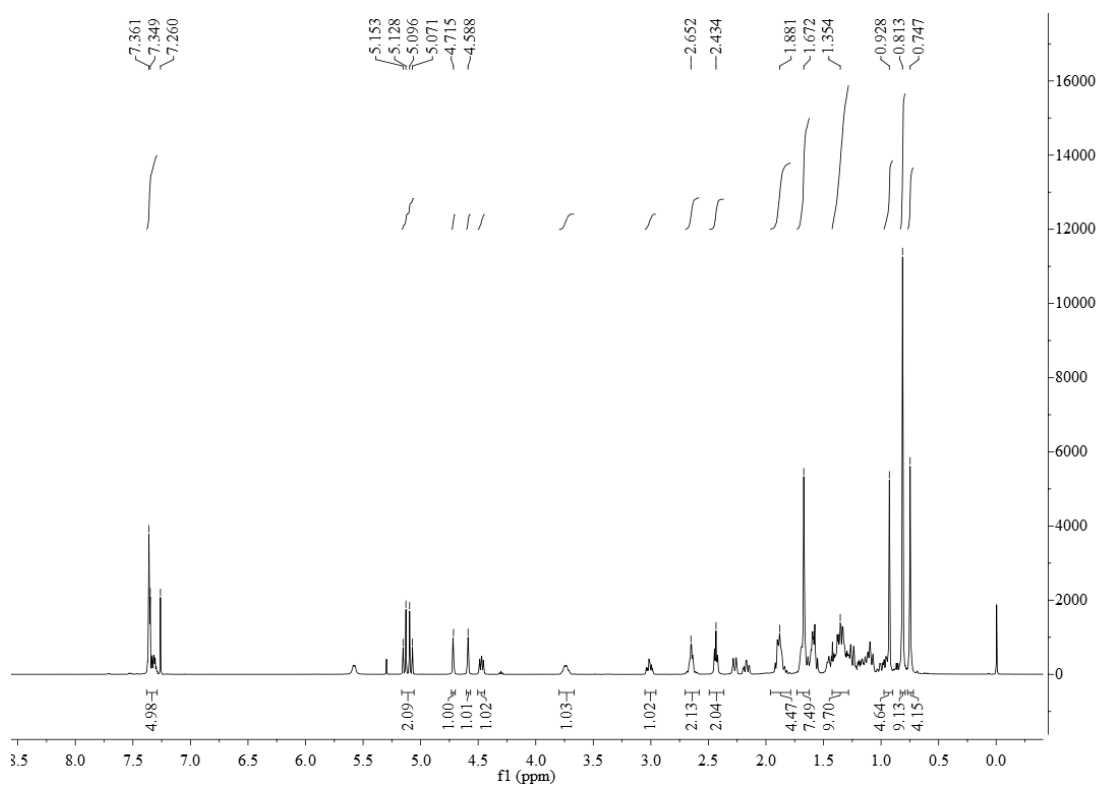

### $^{13}\text{C}$ -NMR spectra of Compound 4a

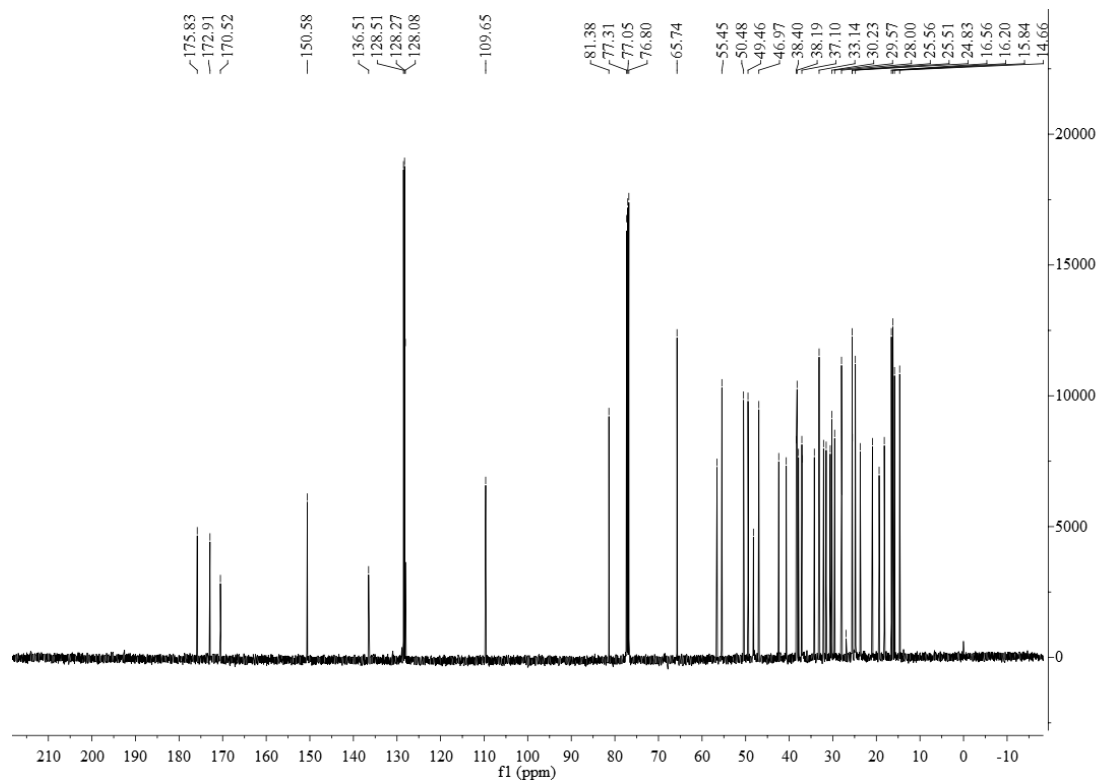

## Compound 4b

### $^1\text{H}$ -NMR spectra of Compound 4b

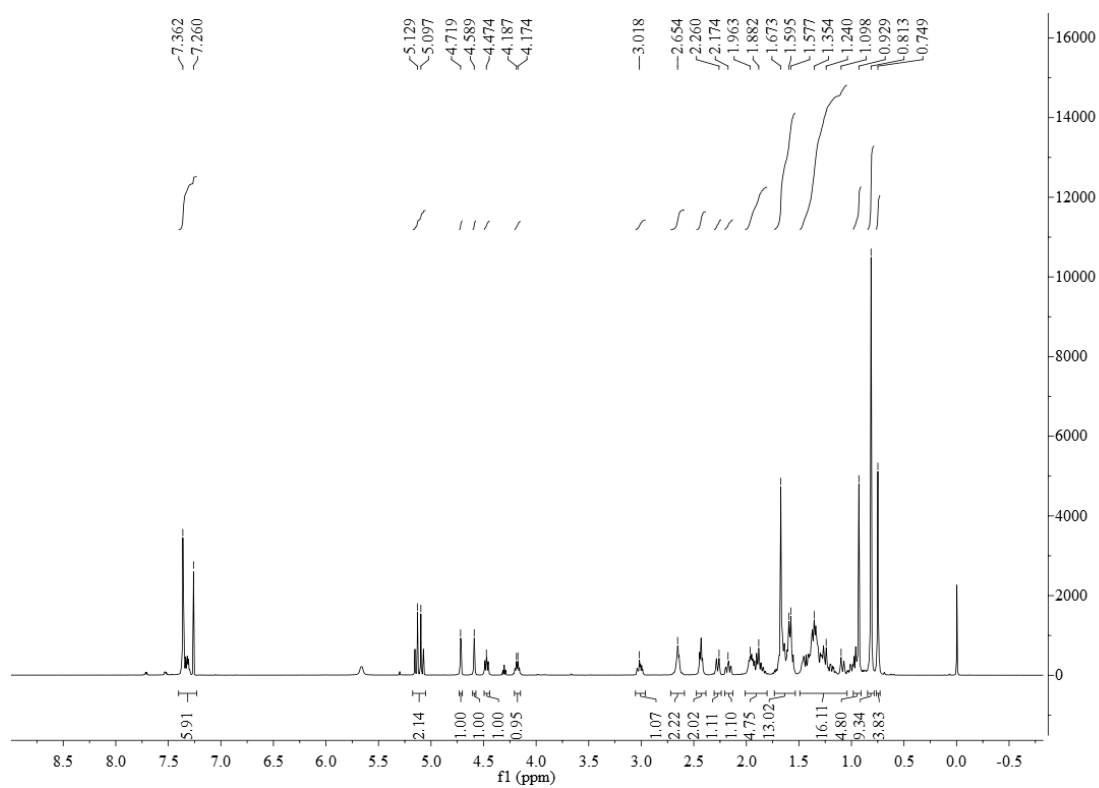

### $^{13}\text{C}$ -NMR spectra of Compound 4b

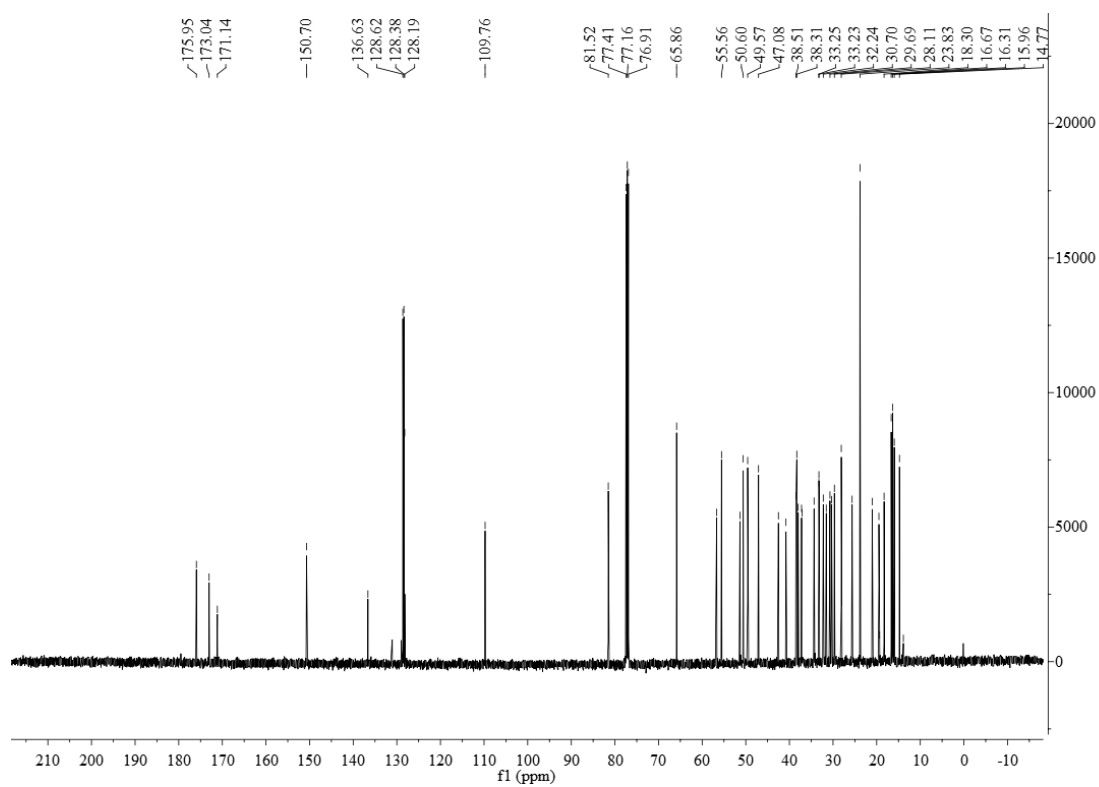

## Compound 4c

### $^1\text{H}$ -NMR spectra of Compound 4c

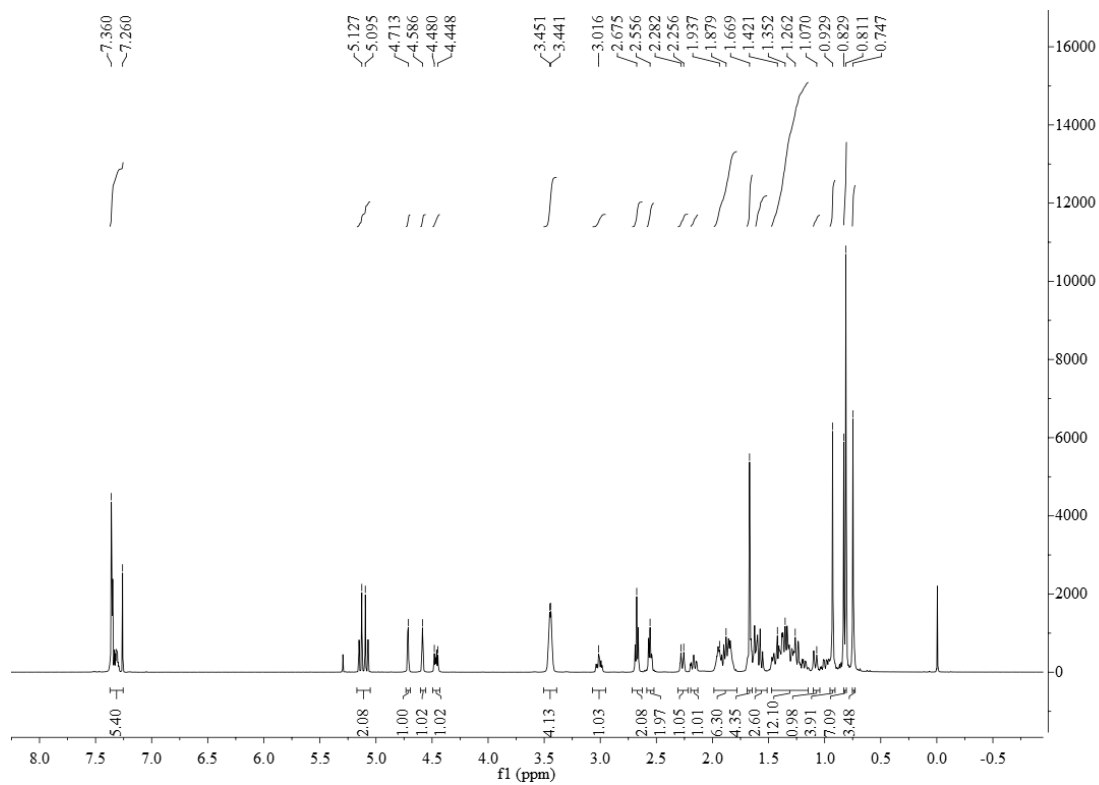

### $^{13}\text{C}$ -NMR spectra of Compound 4c

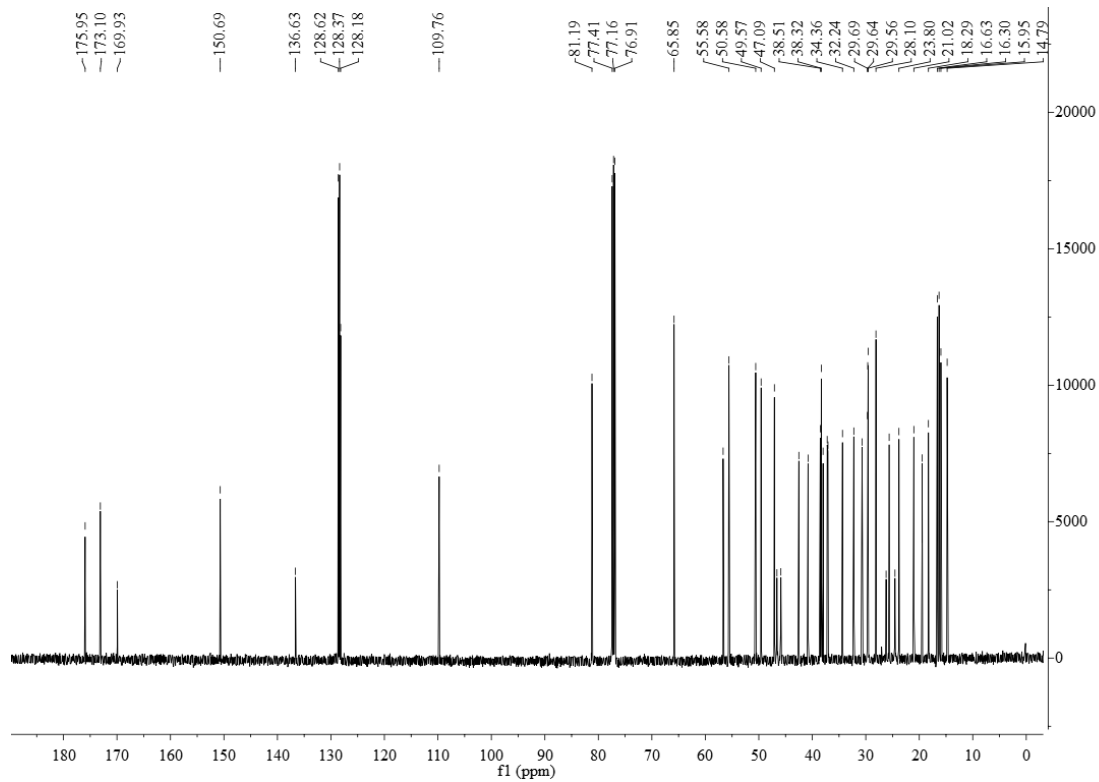

## Compound 4d

### $^1\text{H}$ -NMR spectra of Compound 4d

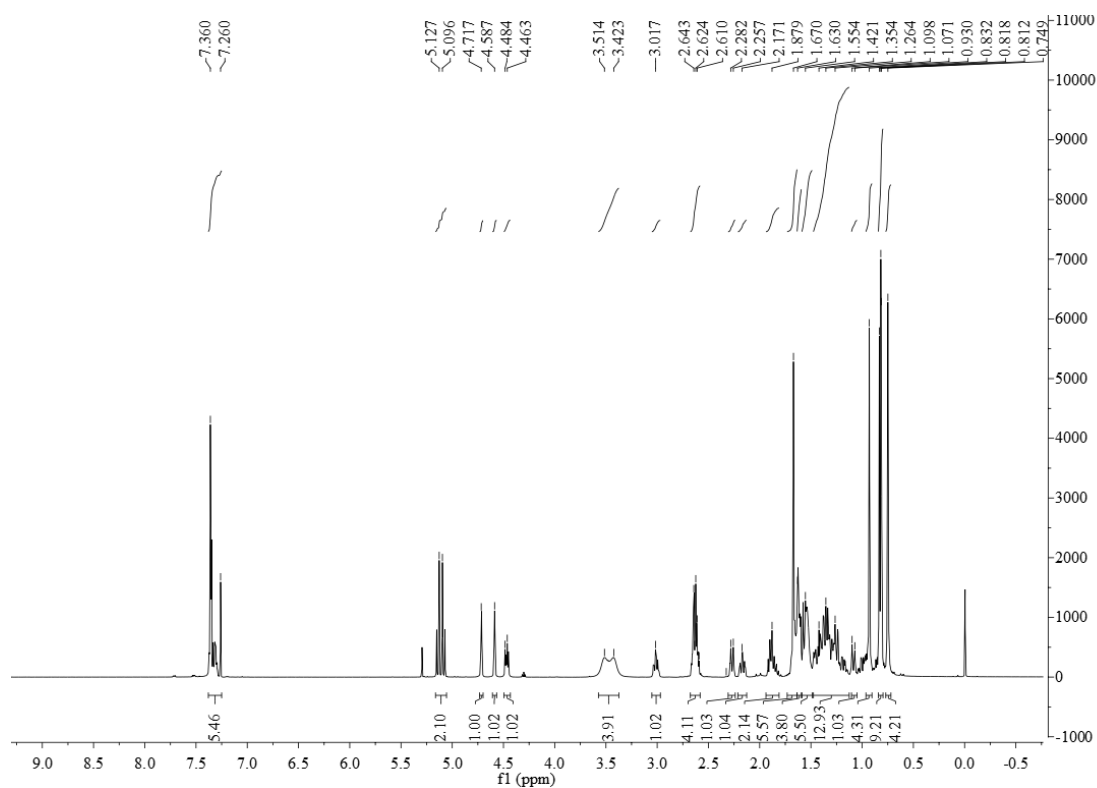

### $^{13}\text{C}$ -NMR spectra of Compound 4d

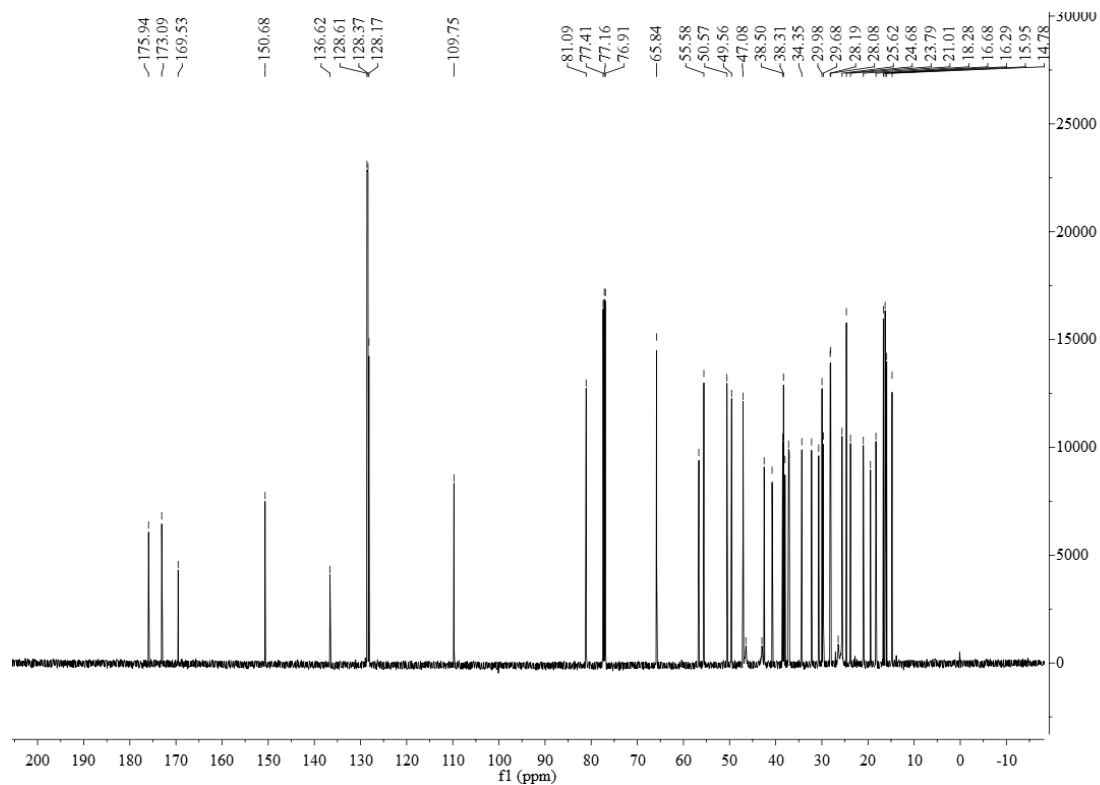

## Compound 5a

### $^1\text{H}$ -NMR spectra of Compound 5a

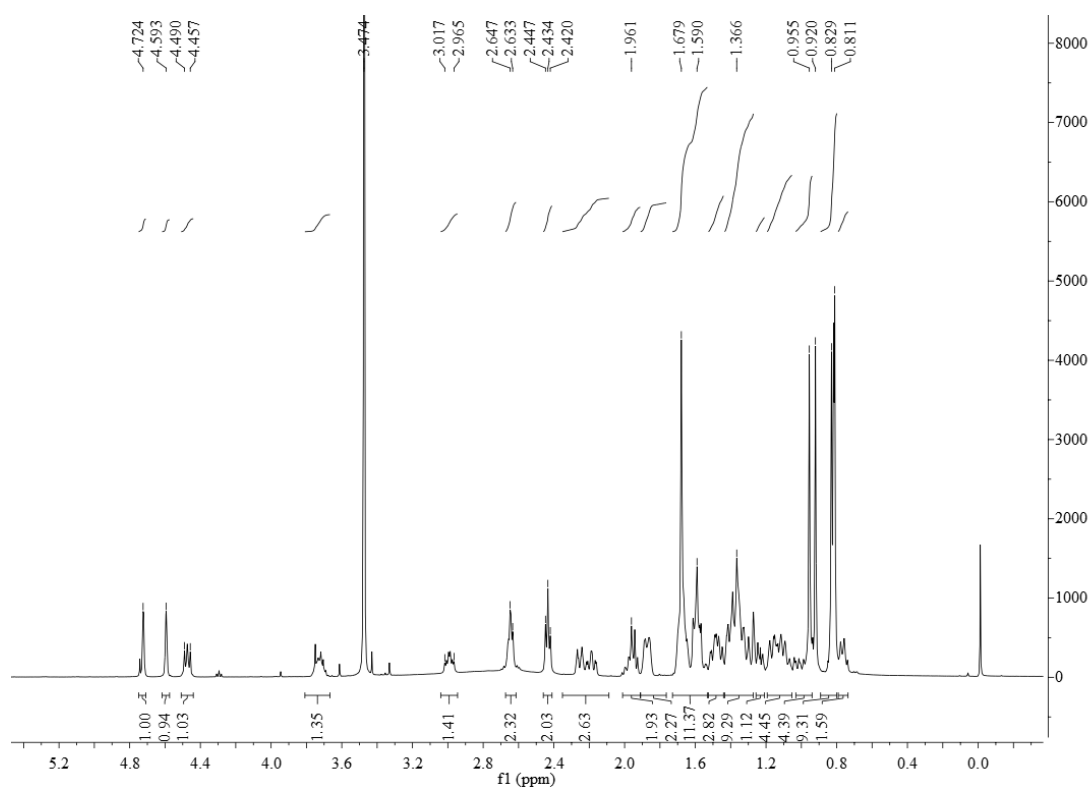

### $^{13}\text{C}$ -NMR spectra of Compound 5a

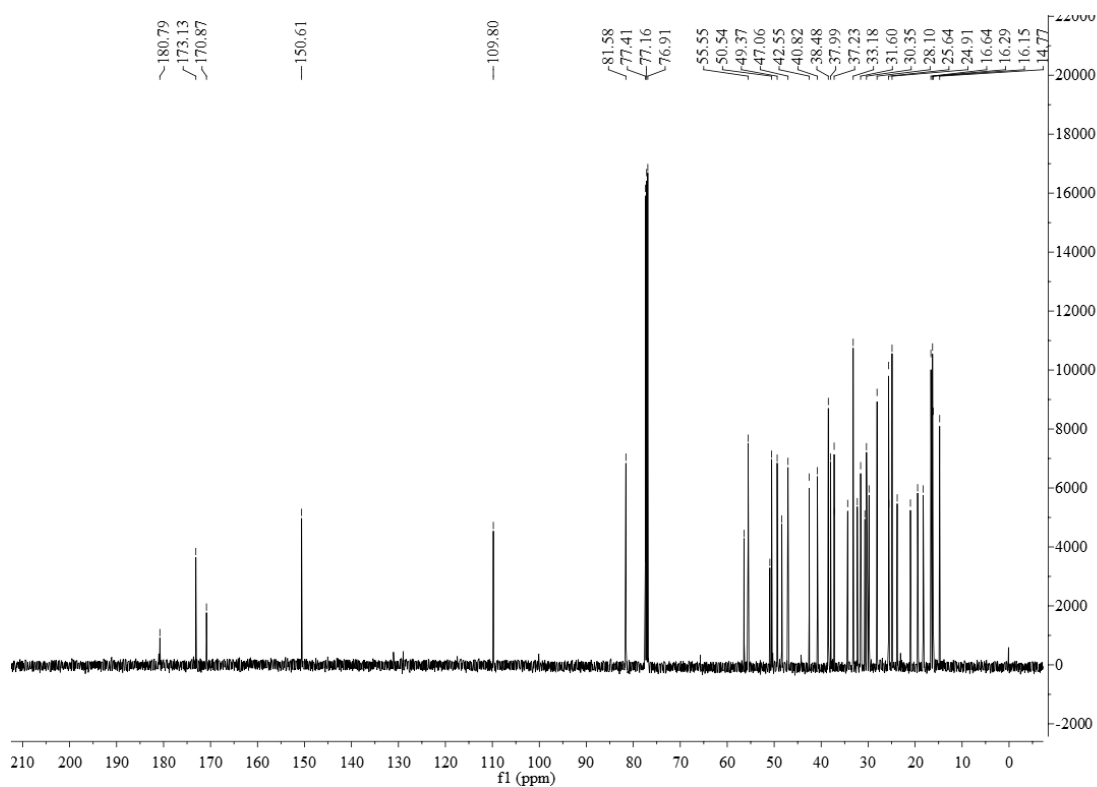

## Compound 5b

### $^1\text{H}$ -NMR spectra of Compound 5b

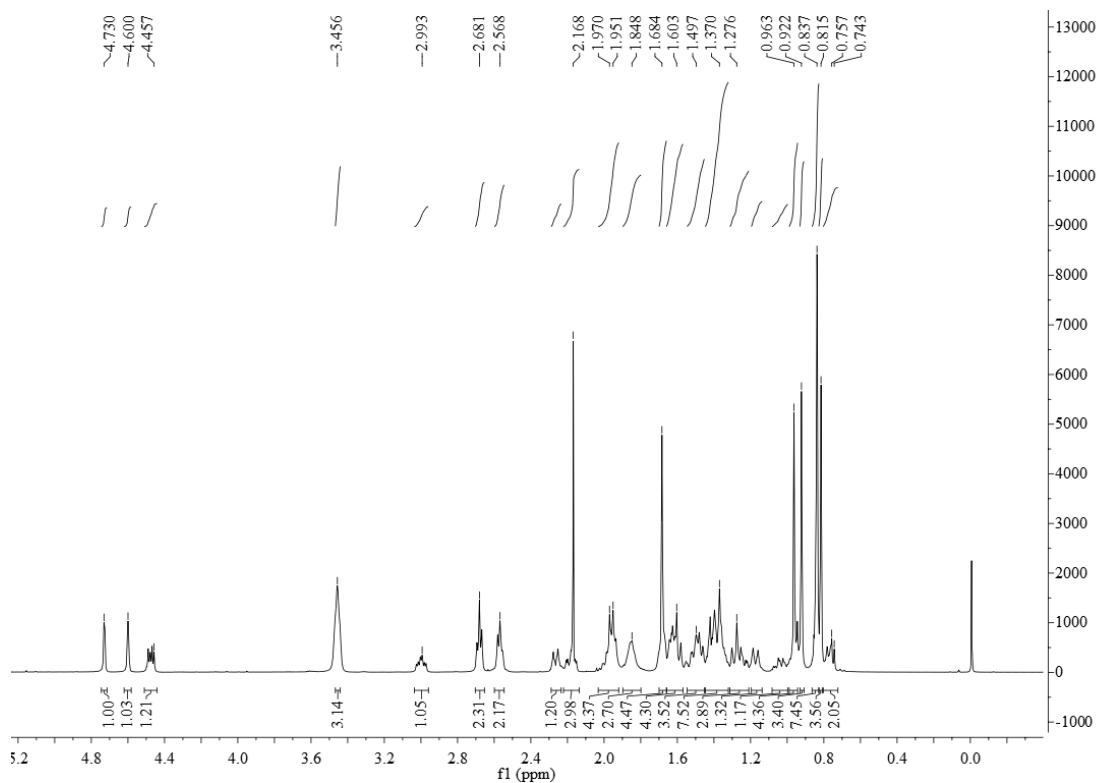

### $^{13}\text{C}$ -NMR spectra of Compound 5b

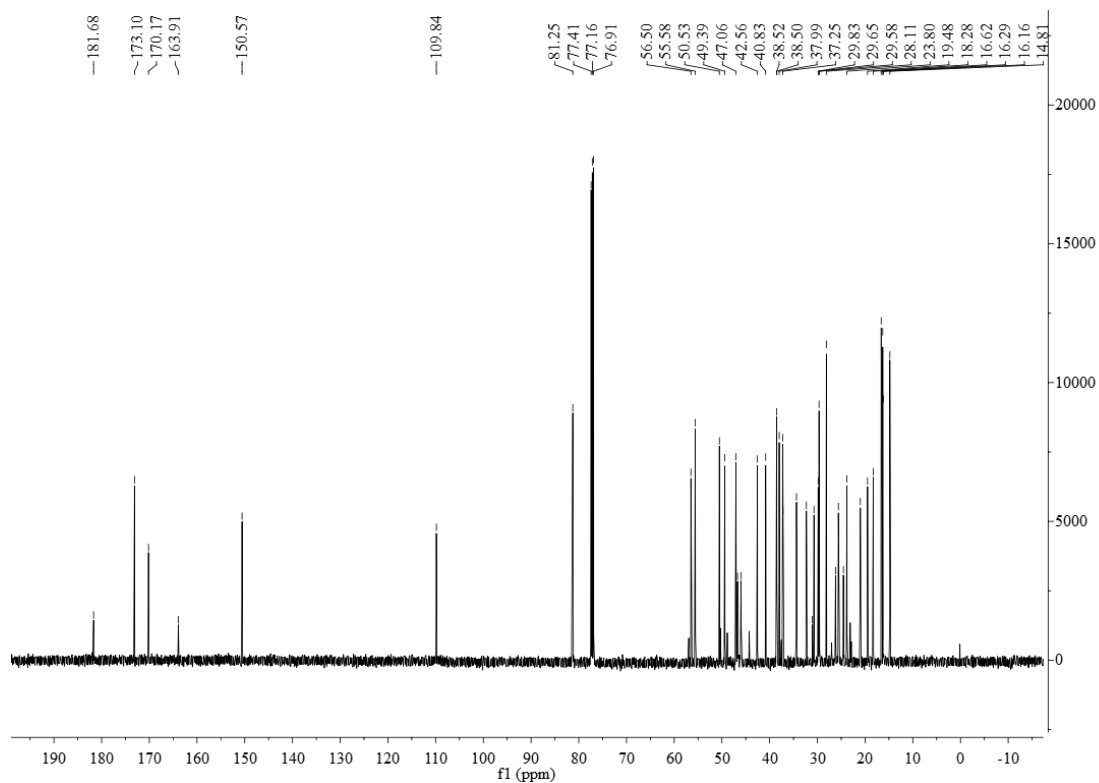

## Compound 5c

### $^1\text{H}$ -NMR spectra of Compound 5c

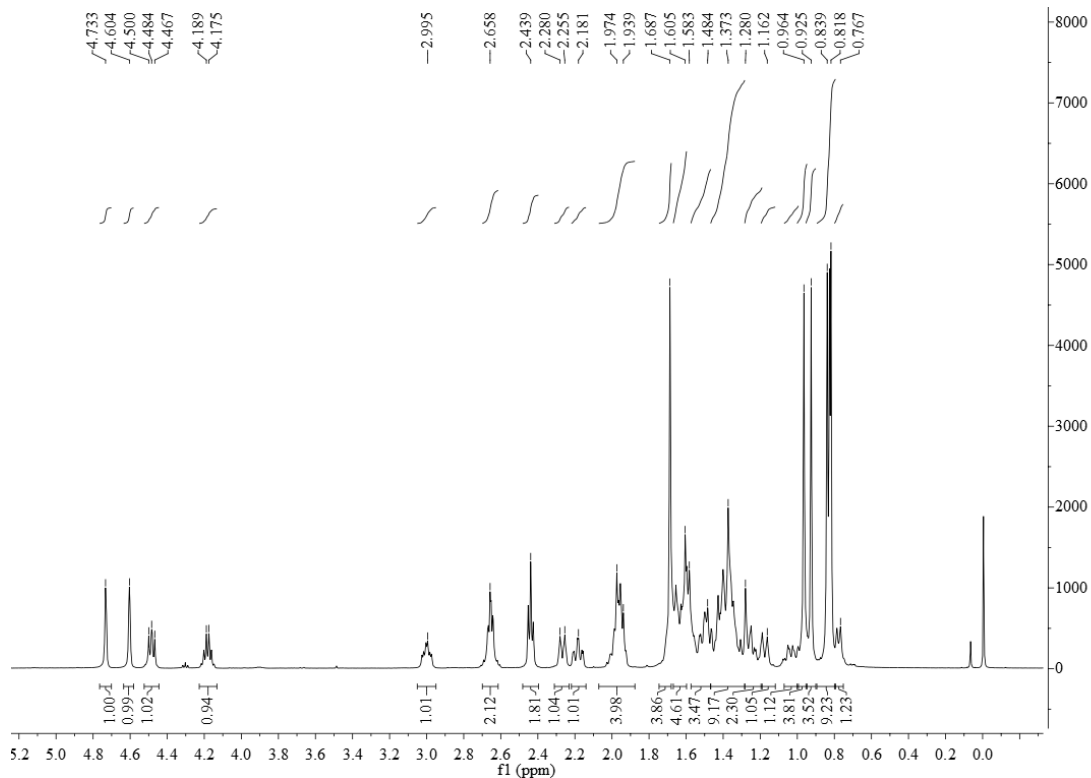

### $^{13}\text{C}$ -NMR spectra of Compound 5c

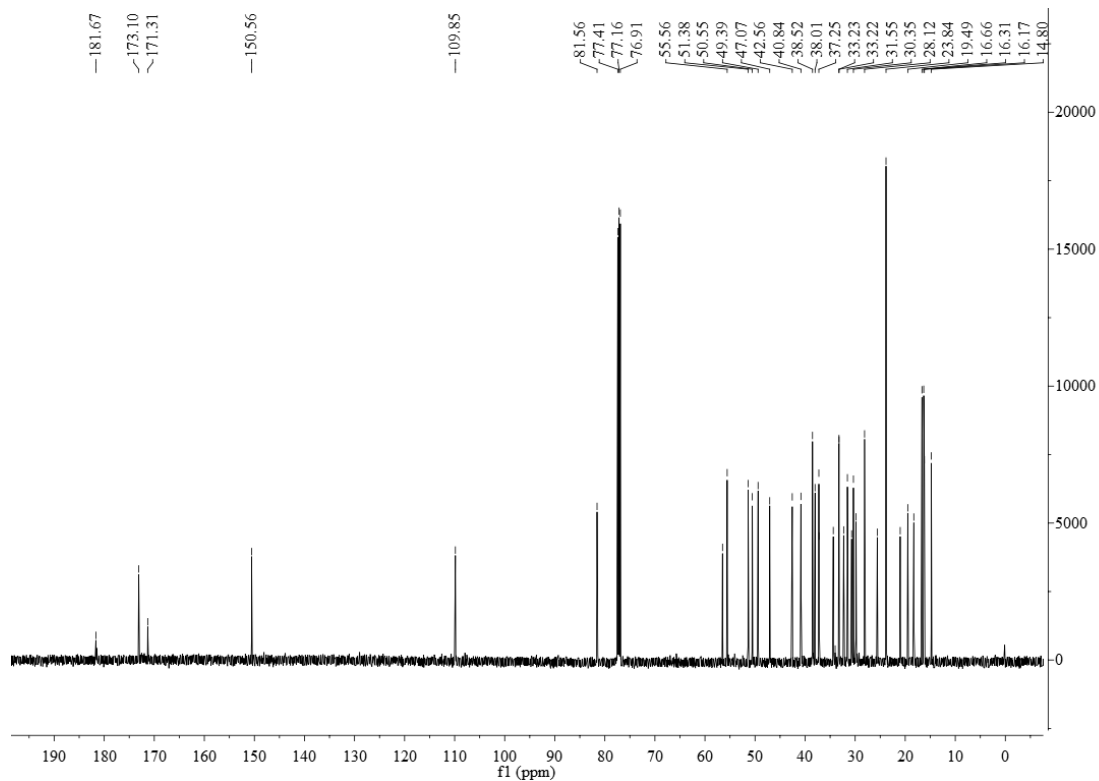



## Compound 5d

### $^1\text{H}$ -NMR spectra of Compound 5d

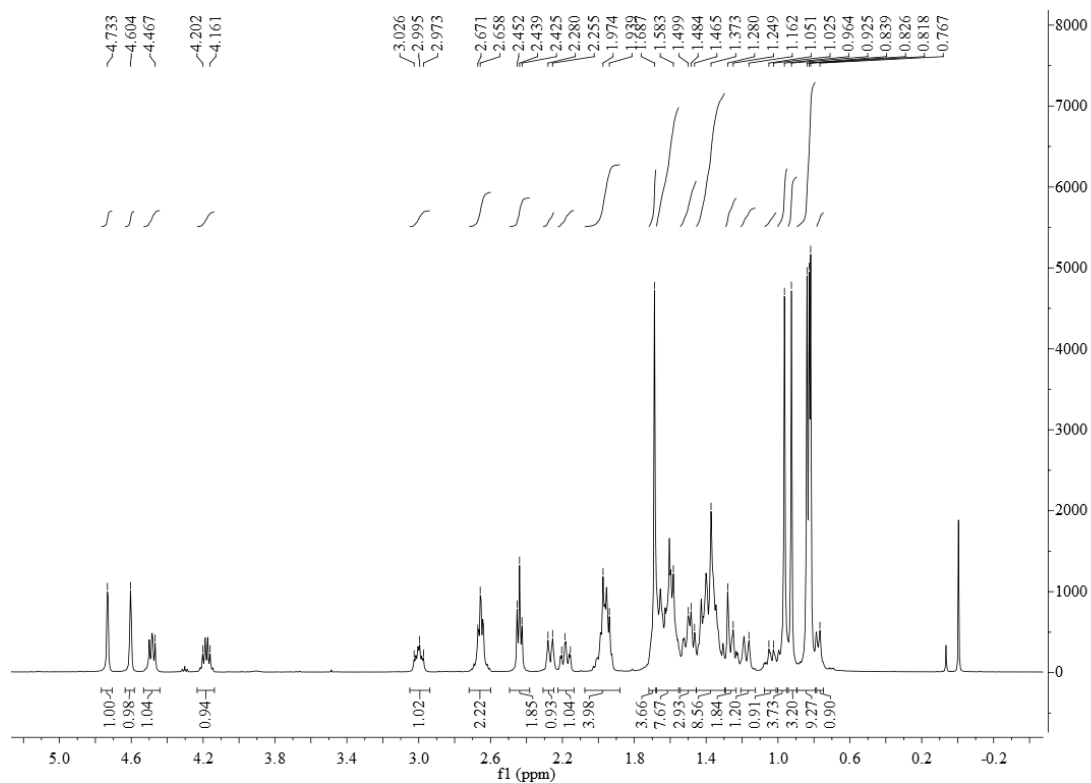

### $^{13}\text{C}$ -NMR spectra of Compound 5d

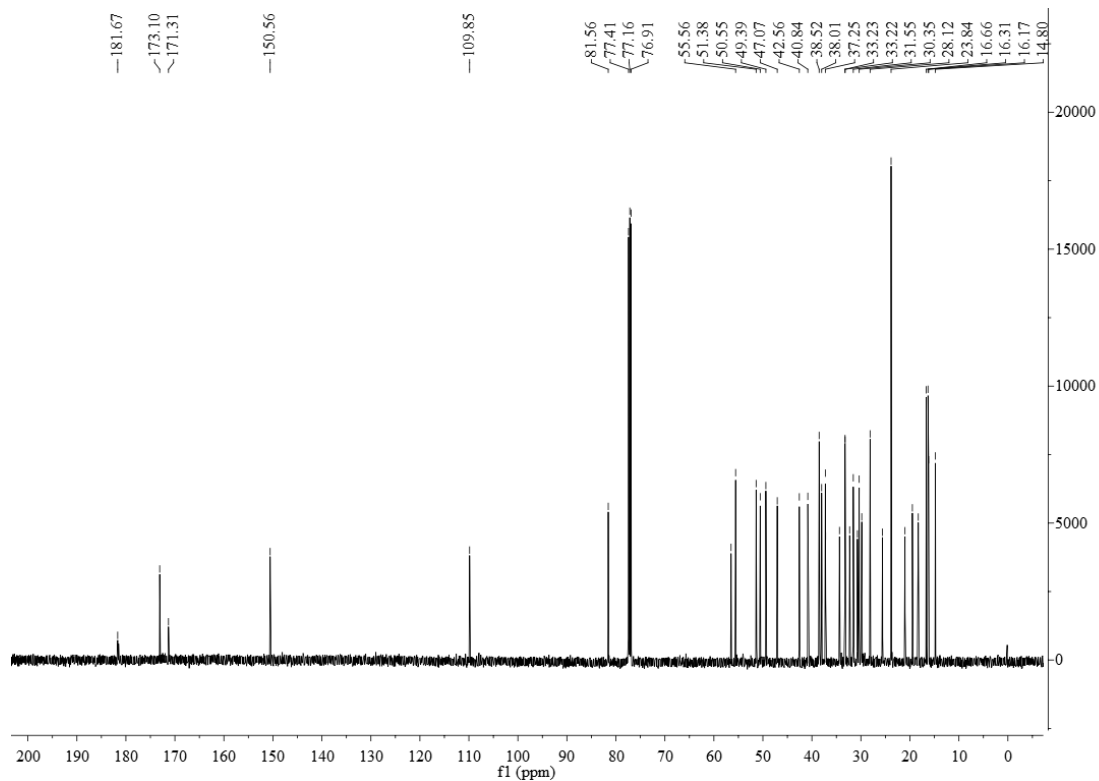

## Compound 6

### $^1\text{H}$ -NMR spectra of Compound 6

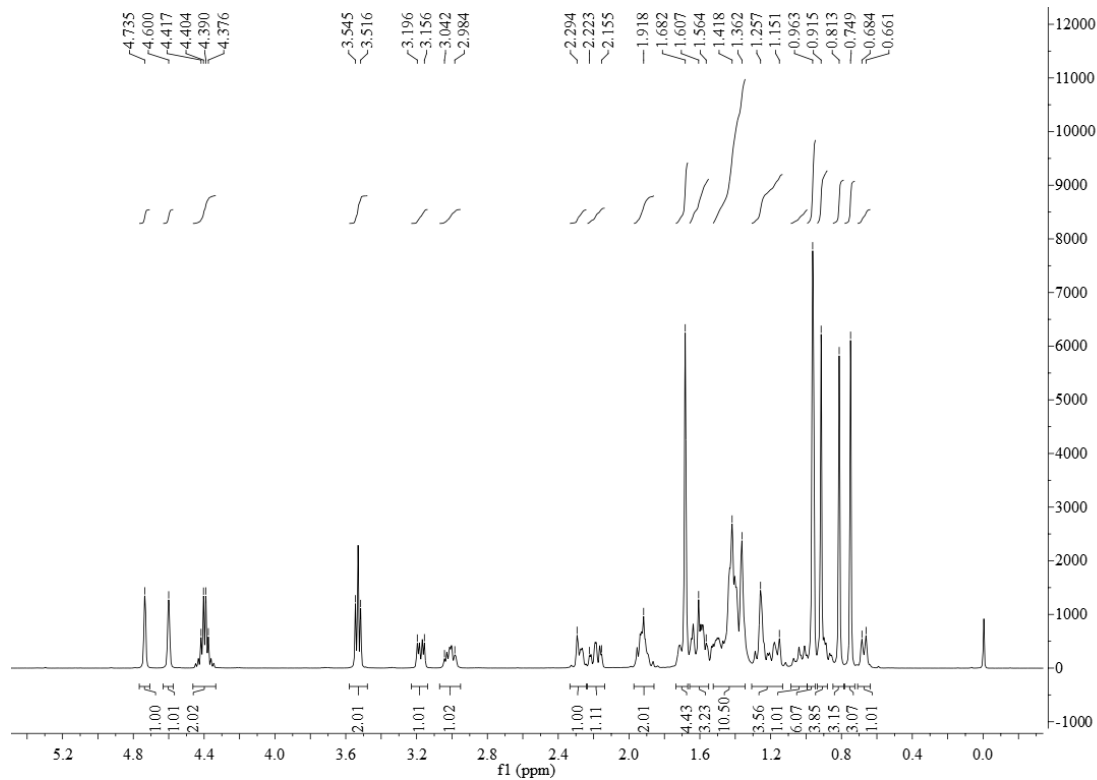

### $^{13}\text{C}$ -NMR spectra of Compound 6

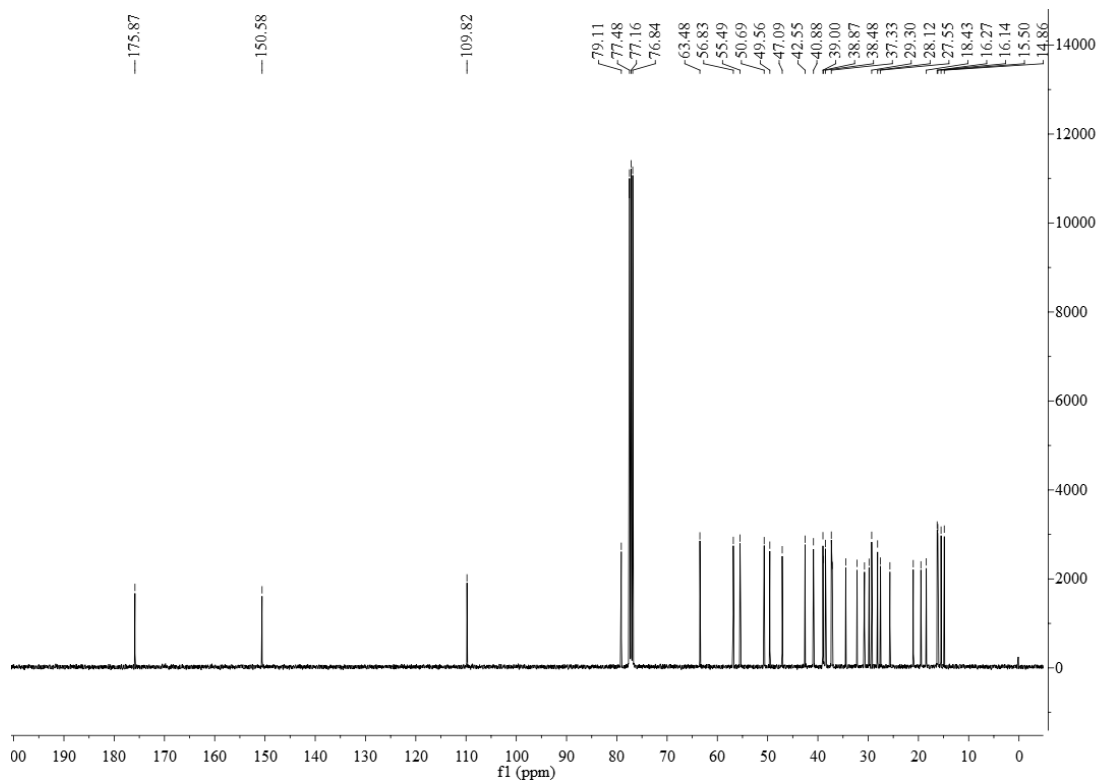

## Compound 7a

### $^1\text{H}$ -NMR spectra of Compound 7a

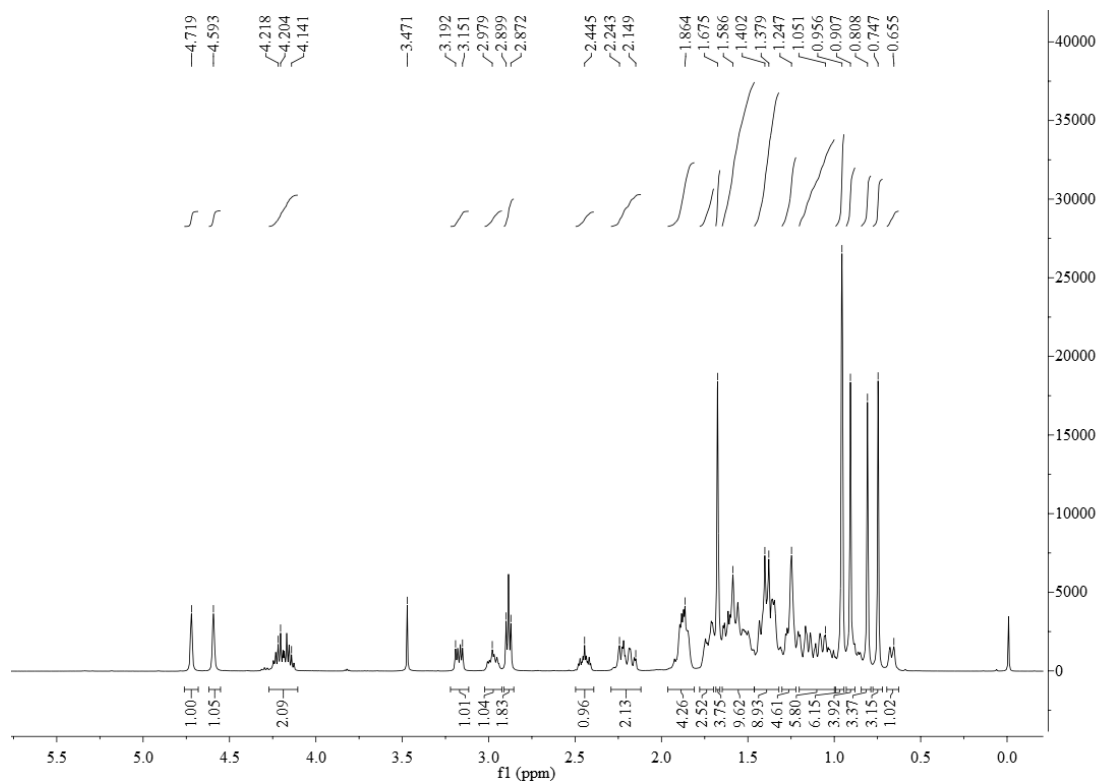

### $^{13}\text{C}$ -NMR spectra of Compound 7a

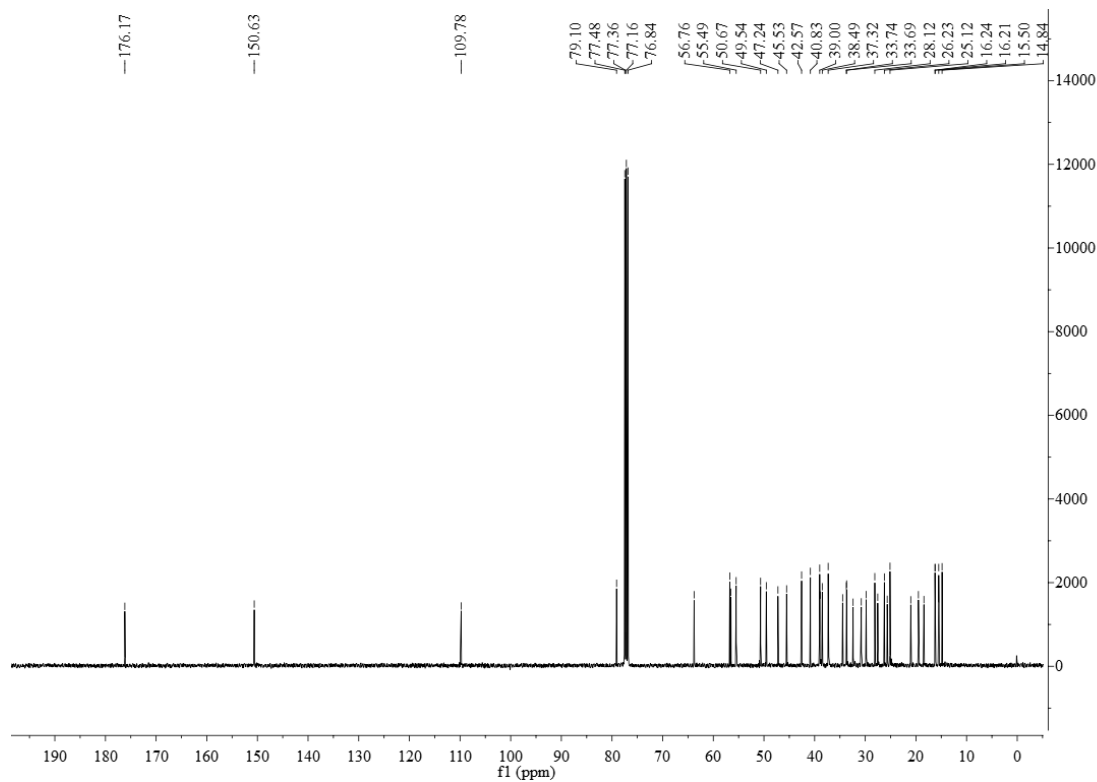

## Compound 7c

### $^1\text{H}$ -NMR spectra of Compound 7c

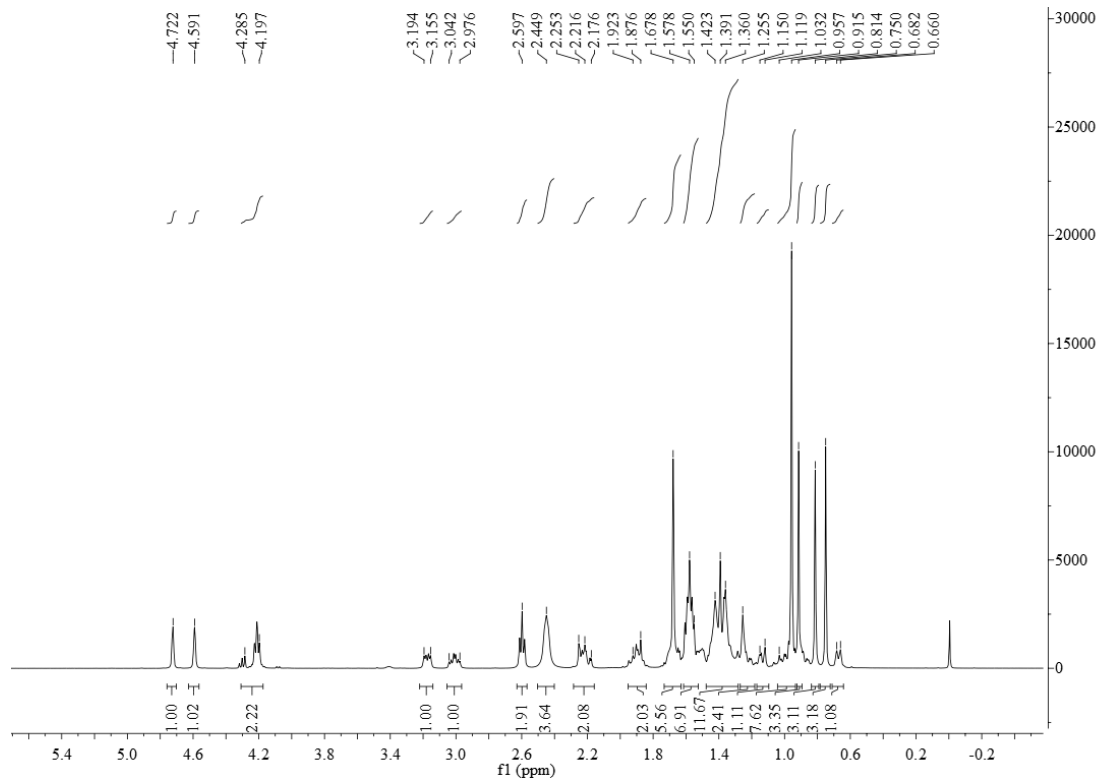

### $^{13}\text{C}$ -NMR spectra of Compound 7c

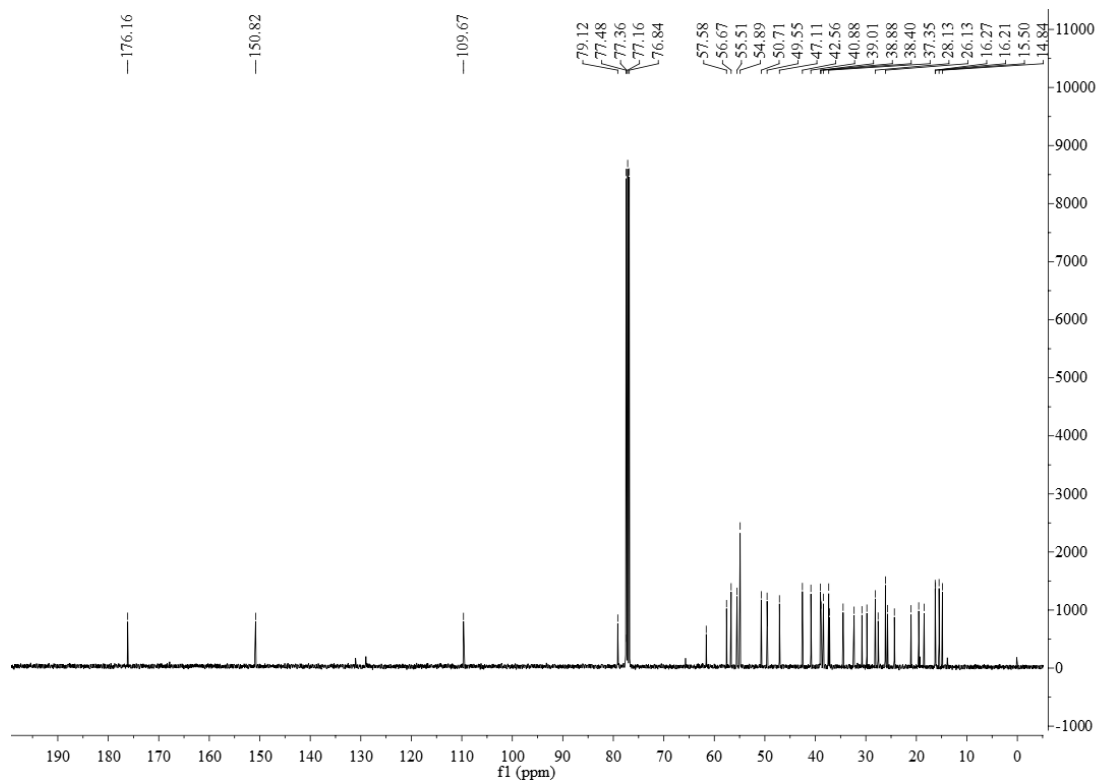

## Compound 7d

### $^1\text{H}$ -NMR spectra of Compound 7d

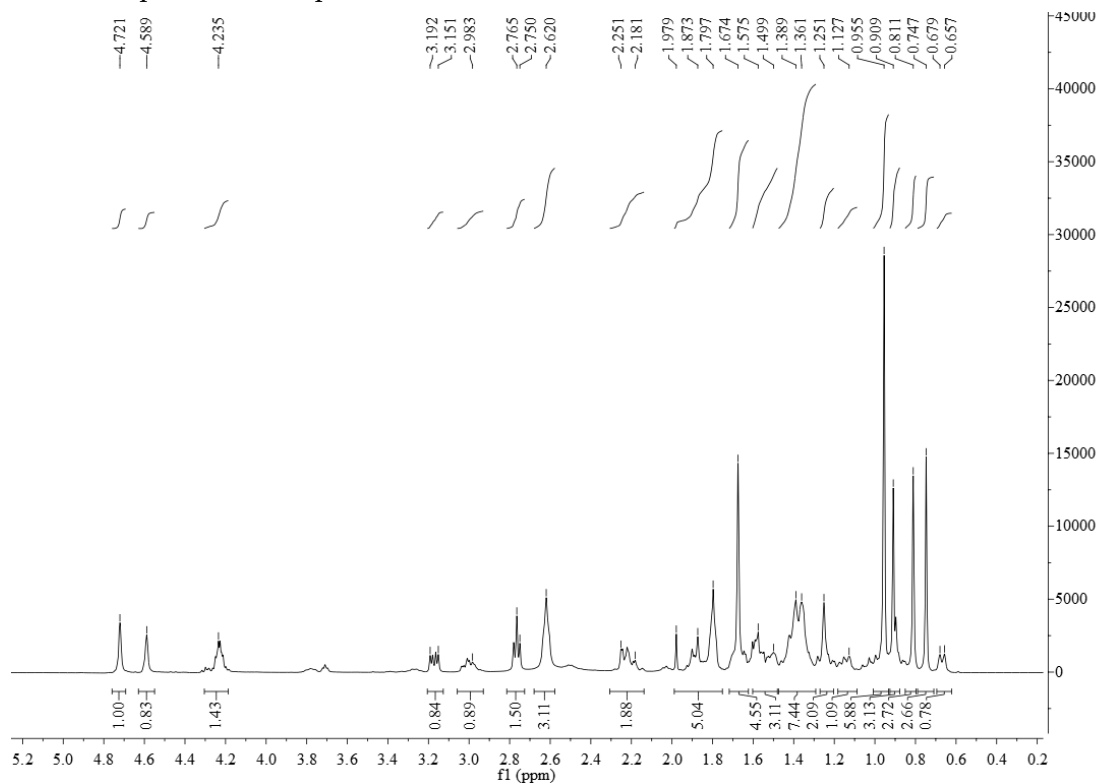

### $^{13}\text{C}$ -NMR spectra of Compound 7d

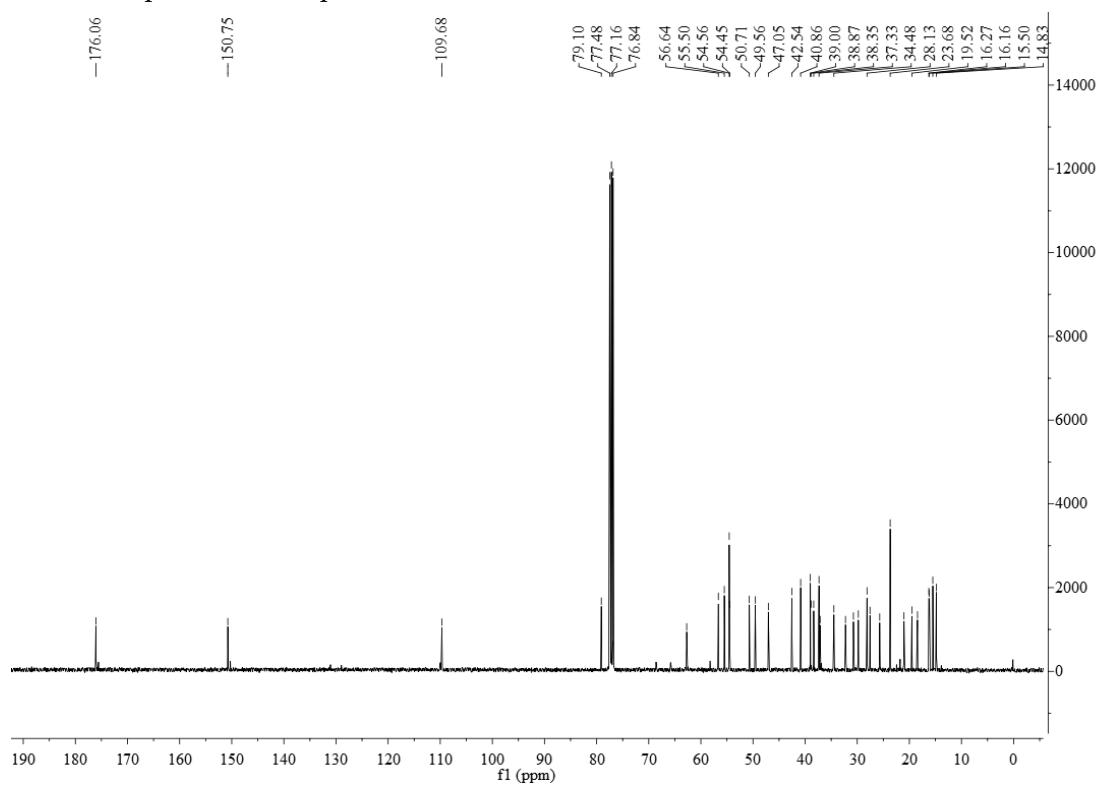

## Compound 7e

### $^1\text{H}$ -NMR spectra of Compound 7e

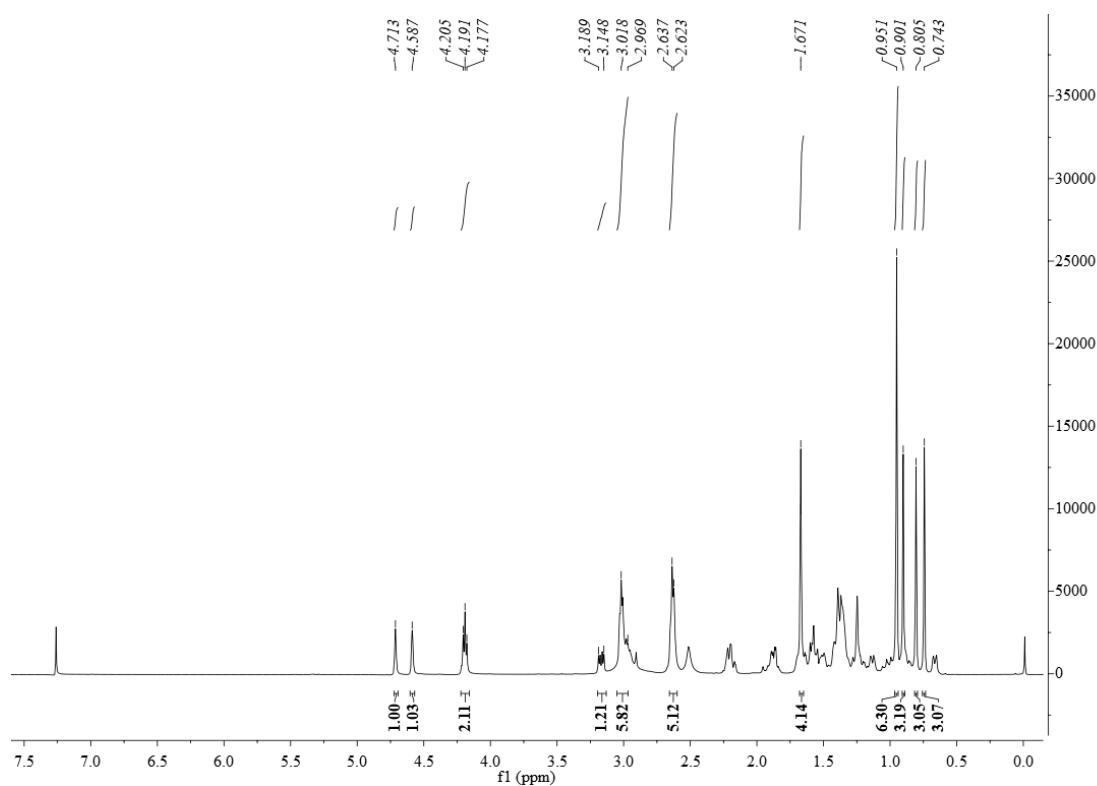

### $^{13}\text{C}$ -NMR spectra of Compound 7e

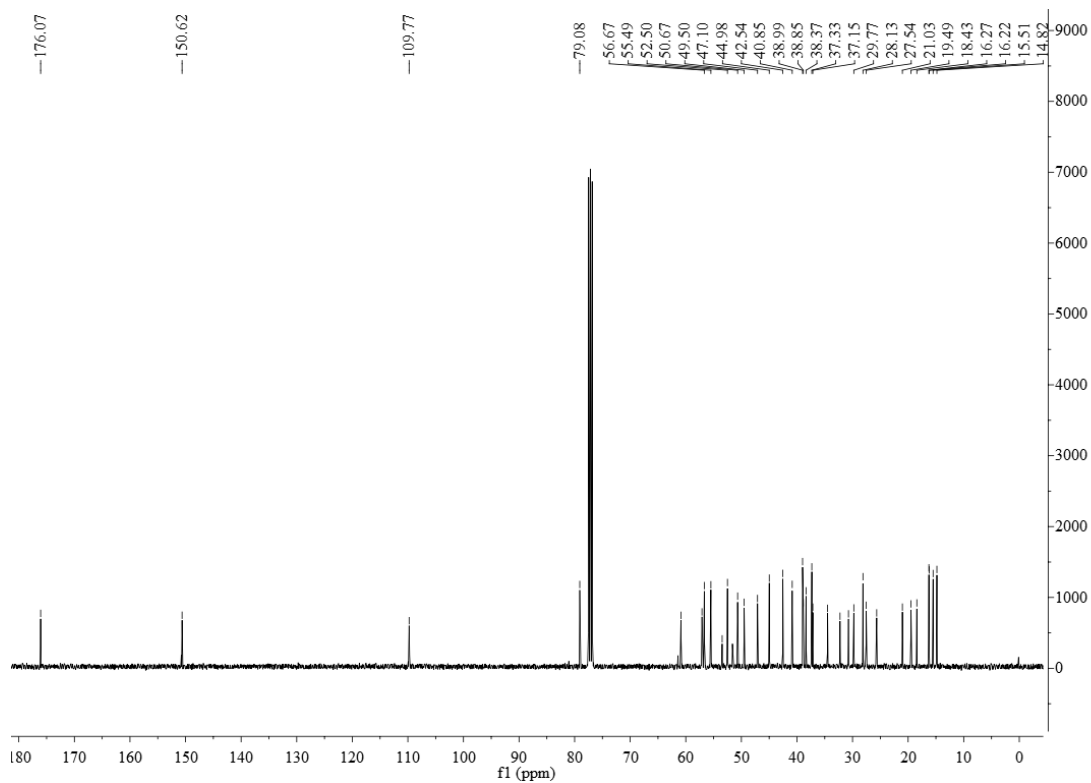

## Compound 8

### $^1\text{H}$ -NMR spectra of Compound 8

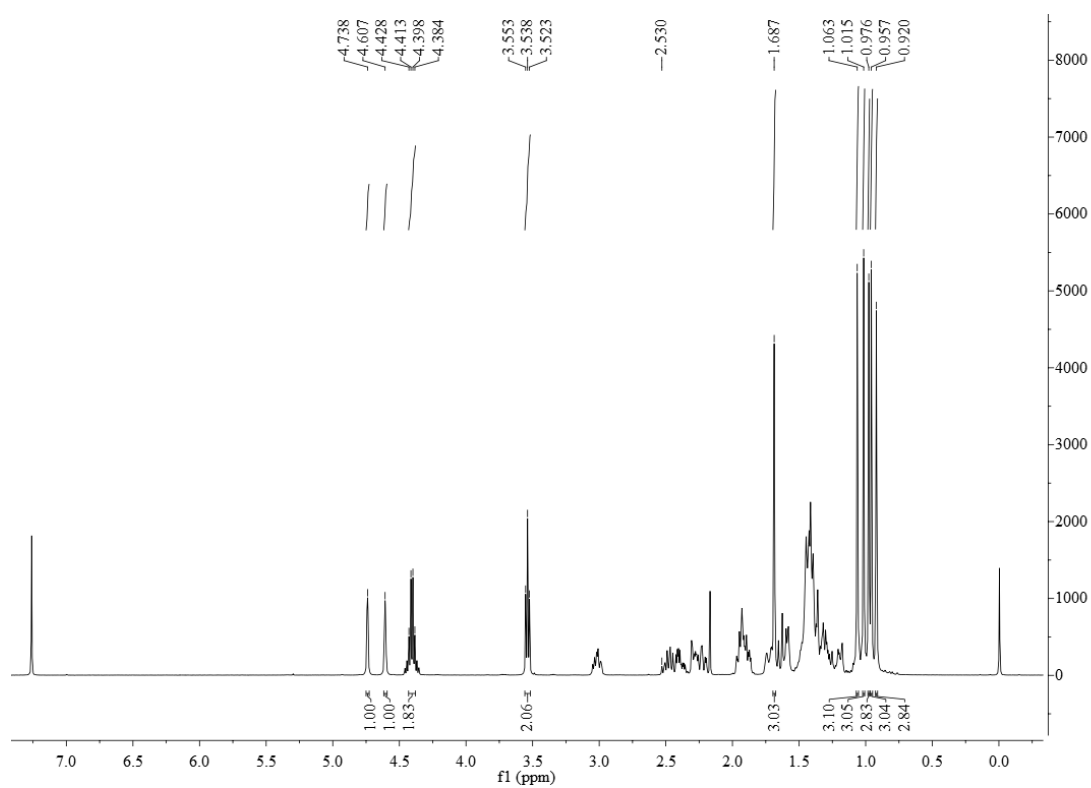

### $^{13}\text{C}$ -NMR spectra of Compound 8

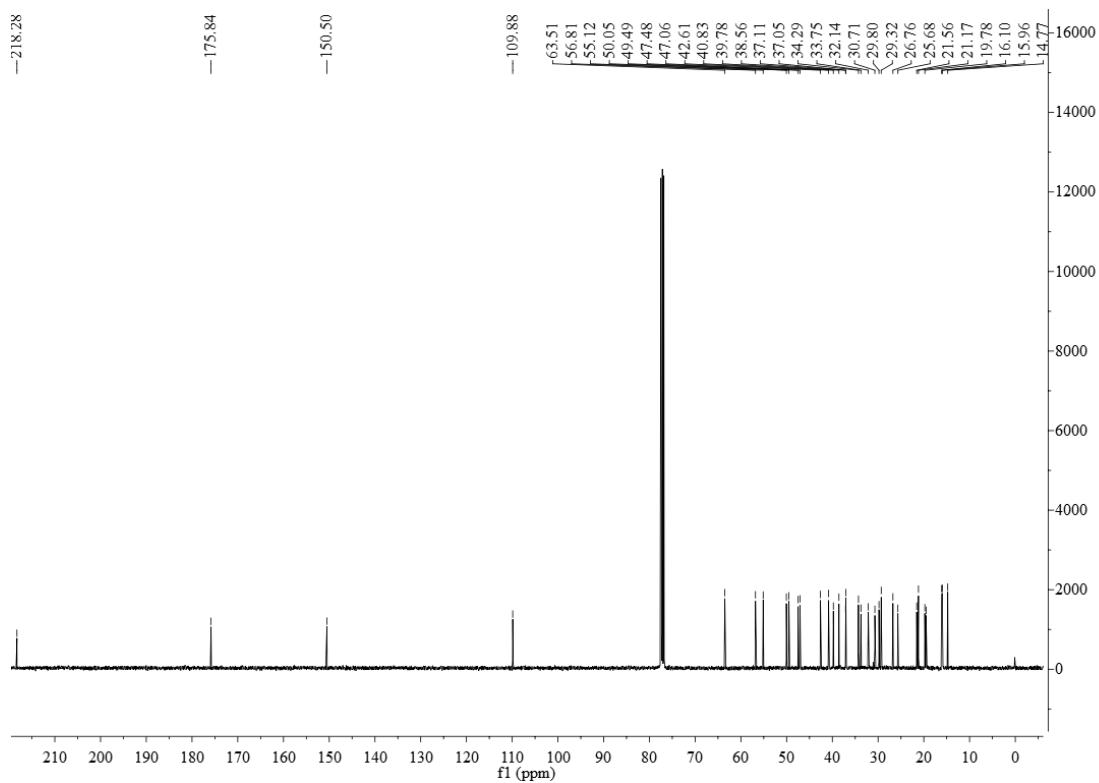

## Compound 9a

### $^1\text{H}$ -NMR spectra of Compound 9a

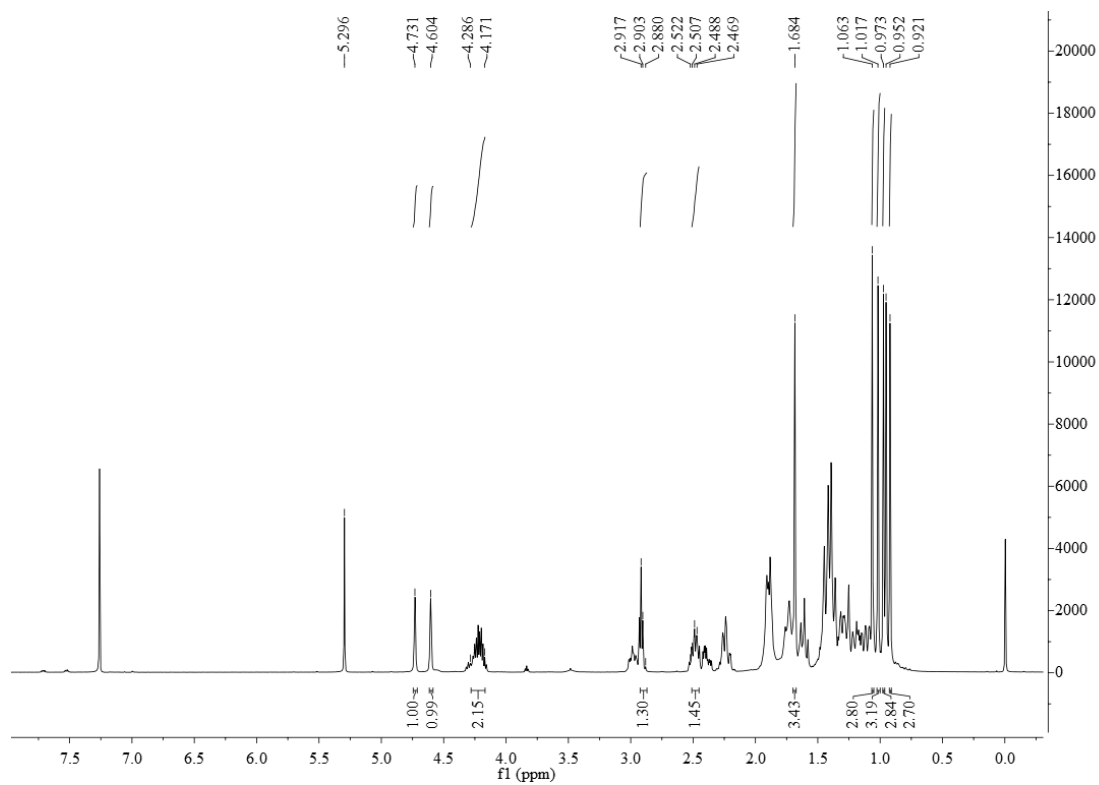

### $^{13}\text{C}$ -NMR spectra of Compound 9a

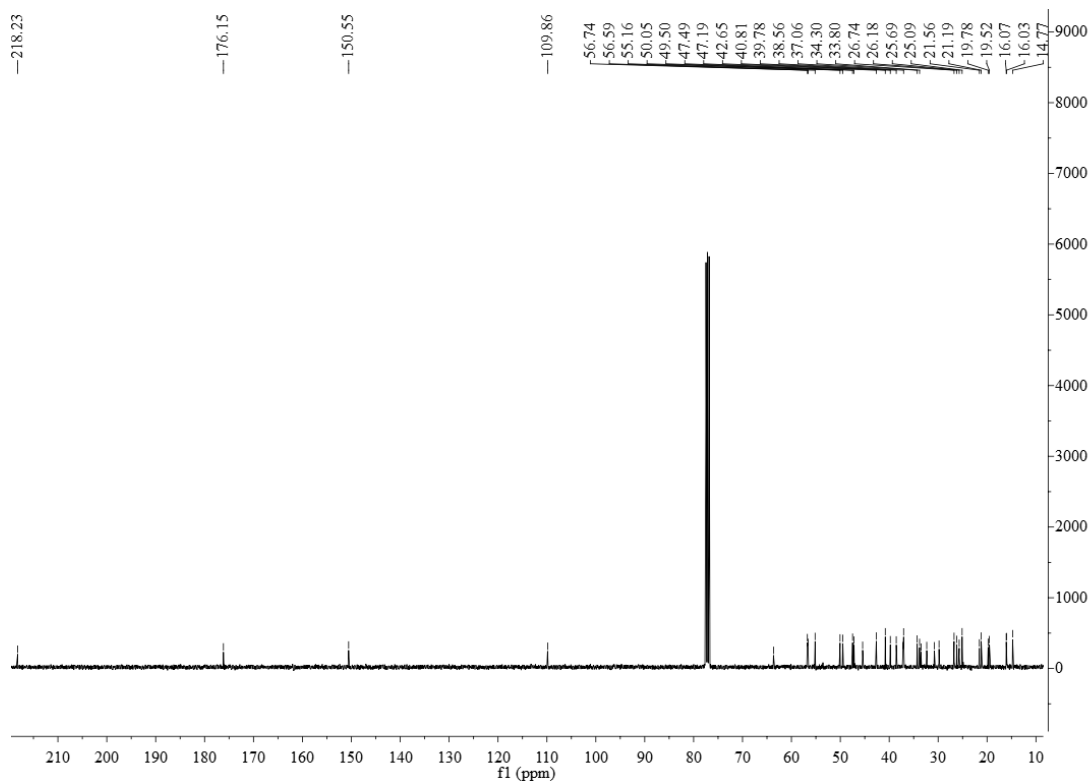



## Compound 9b

### $^1\text{H}$ -NMR spectra of Compound 9b

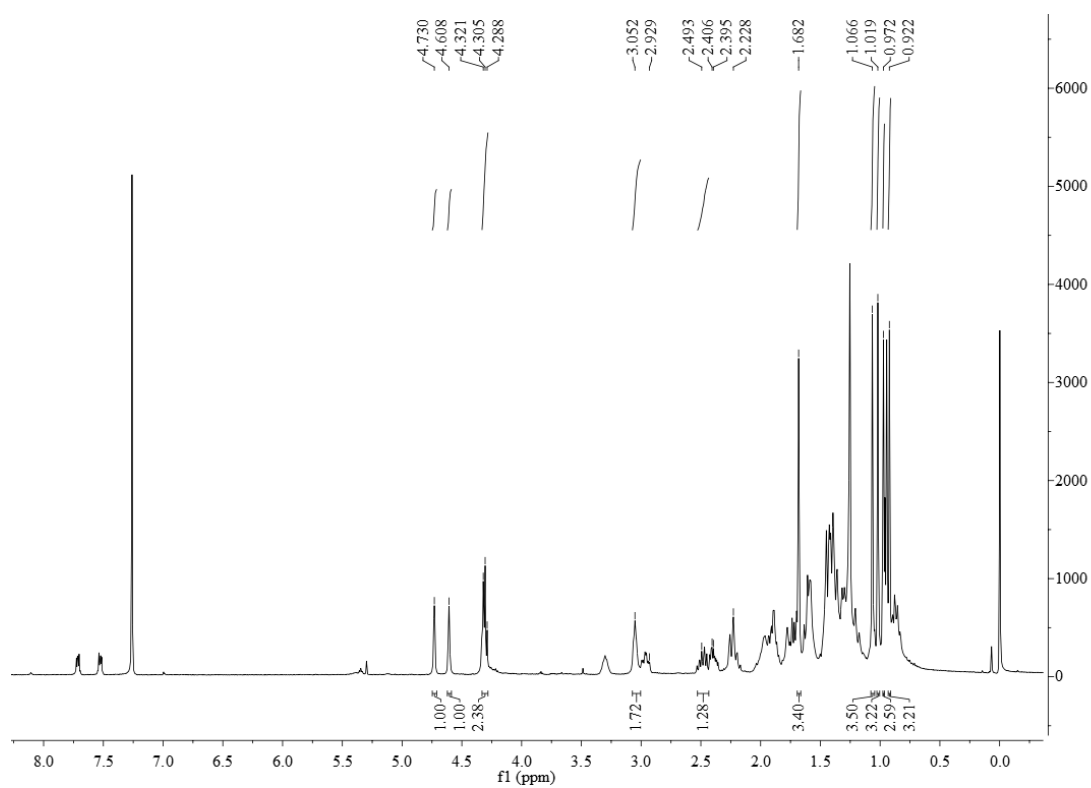

### $^{13}\text{C}$ -NMR spectra of Compound 9b

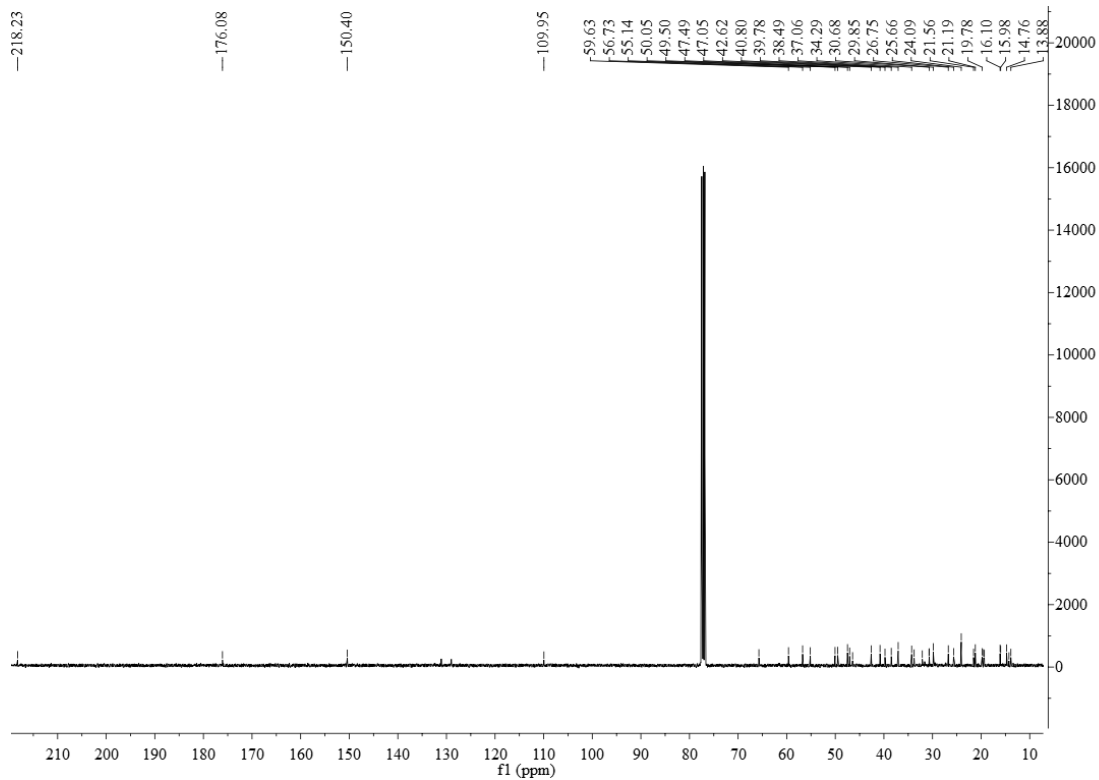

## Compound 9c

### $^1\text{H}$ -NMR spectra of Compound 9c

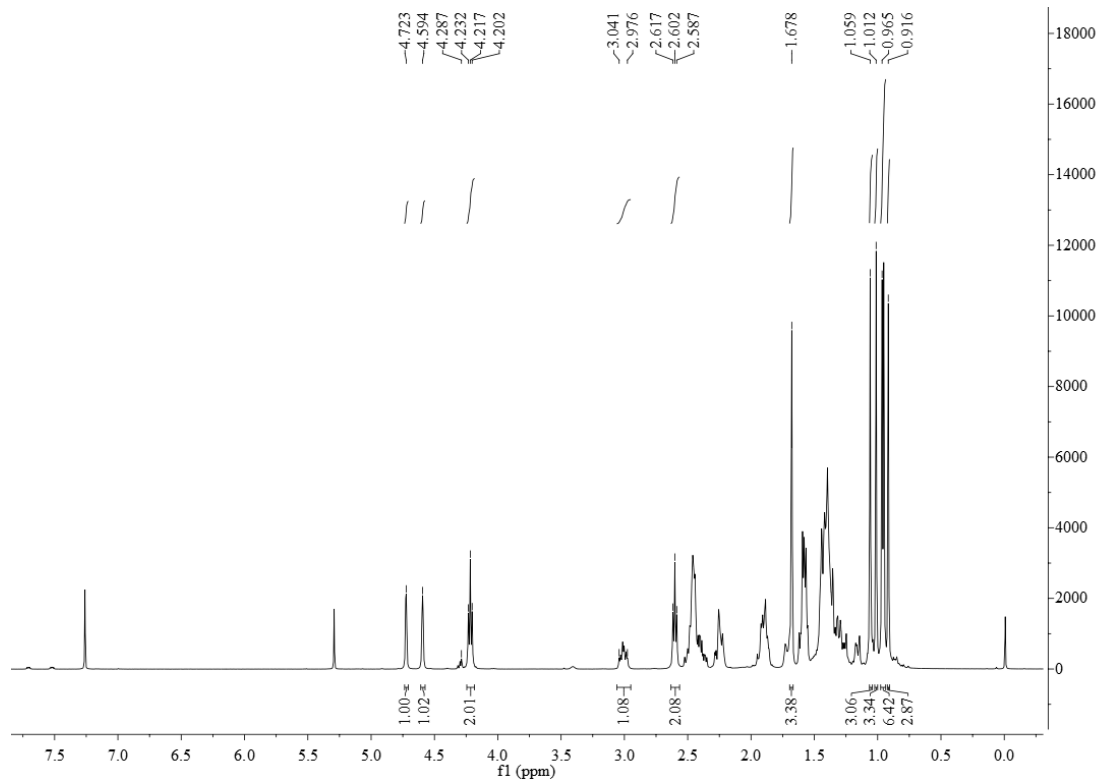

### $^{13}\text{C}$ -NMR spectra of Compound 9c

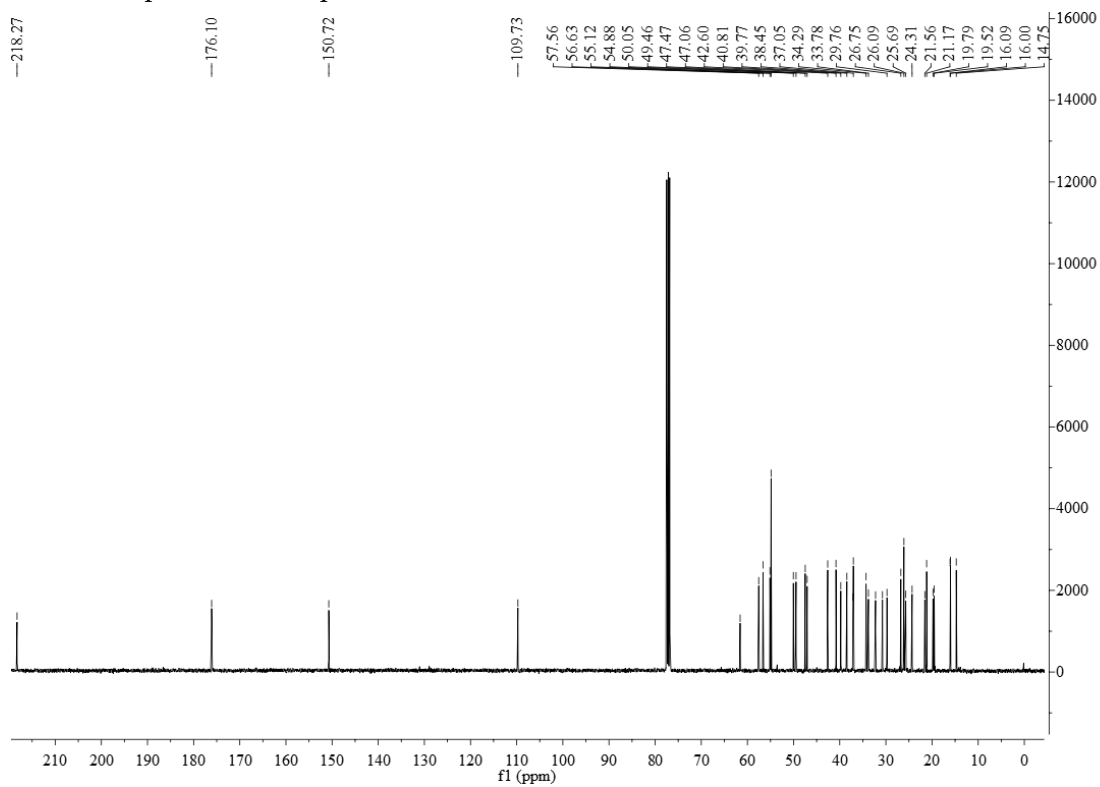

## Compound 9d

### $^1\text{H}$ -NMR spectra of Compound 9d

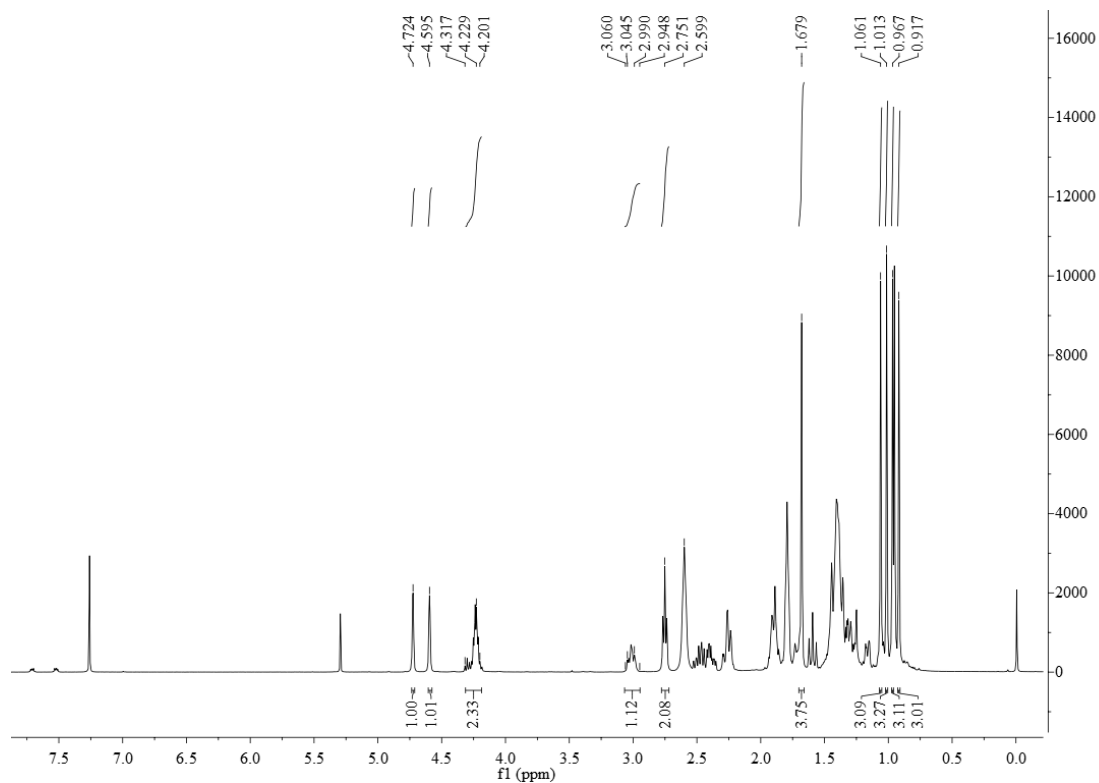

### $^{13}\text{C}$ -NMR spectra of Compound 9d

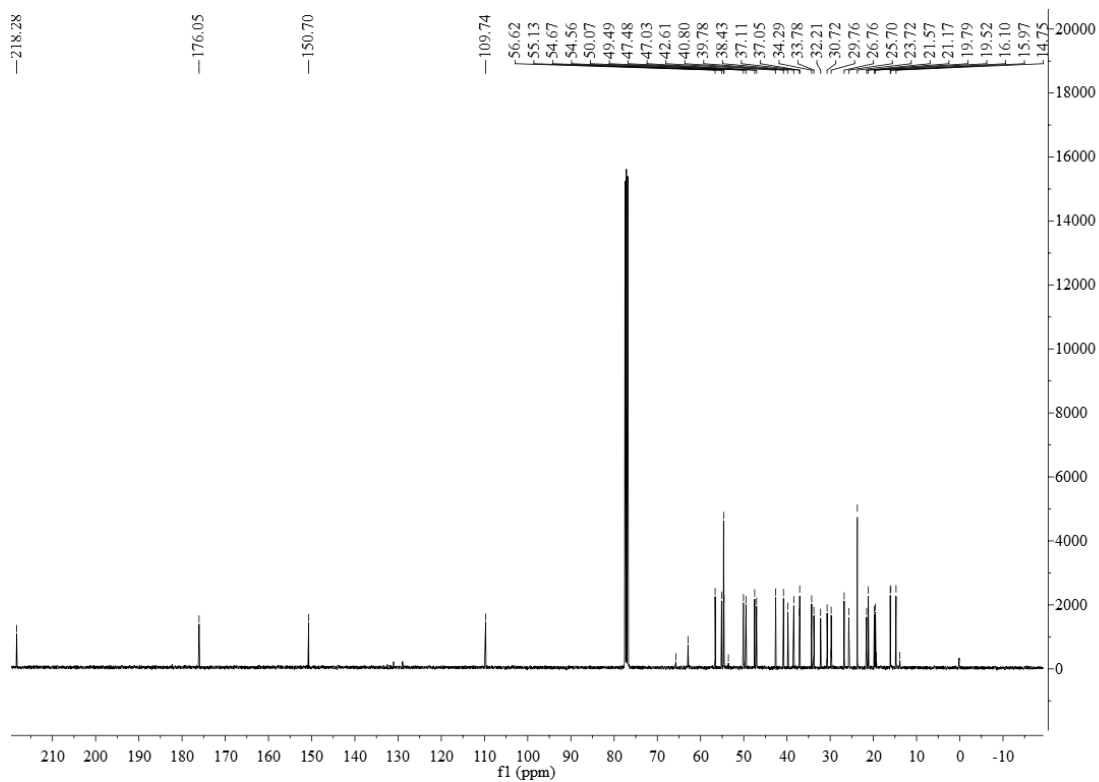

## Compound 10

### $^1\text{H}$ -NMR spectra of Compound 10

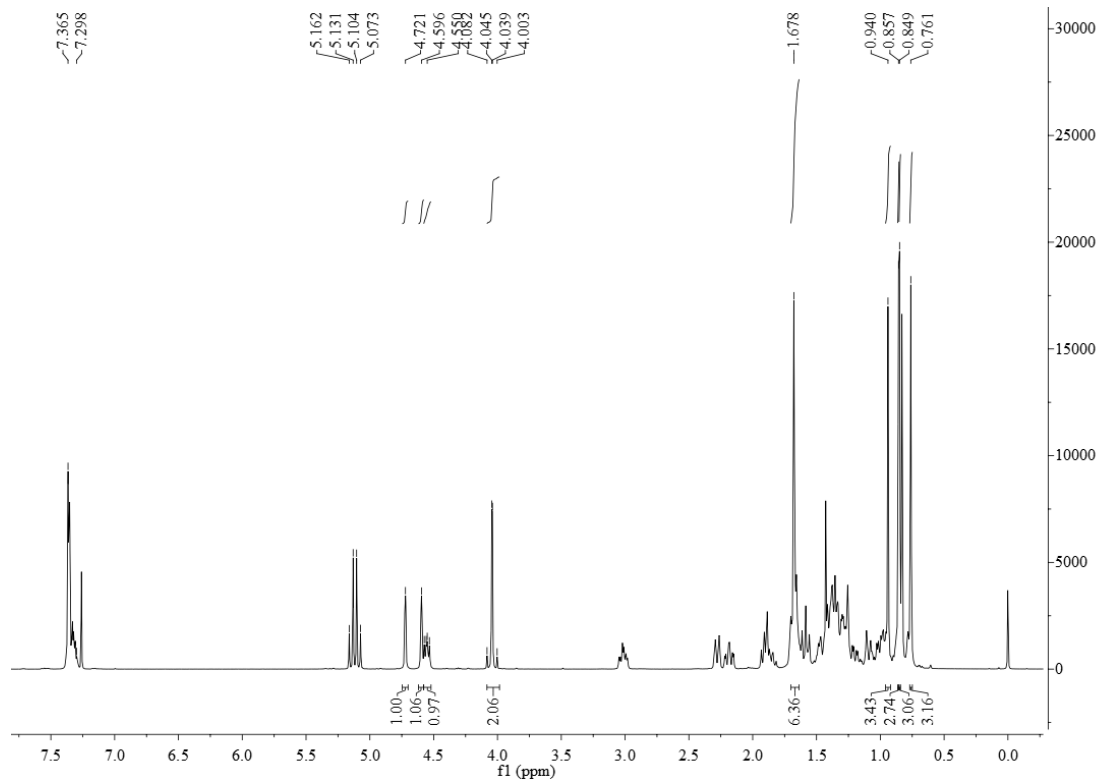

### $^{13}\text{C}$ -NMR spectra of Compound 10

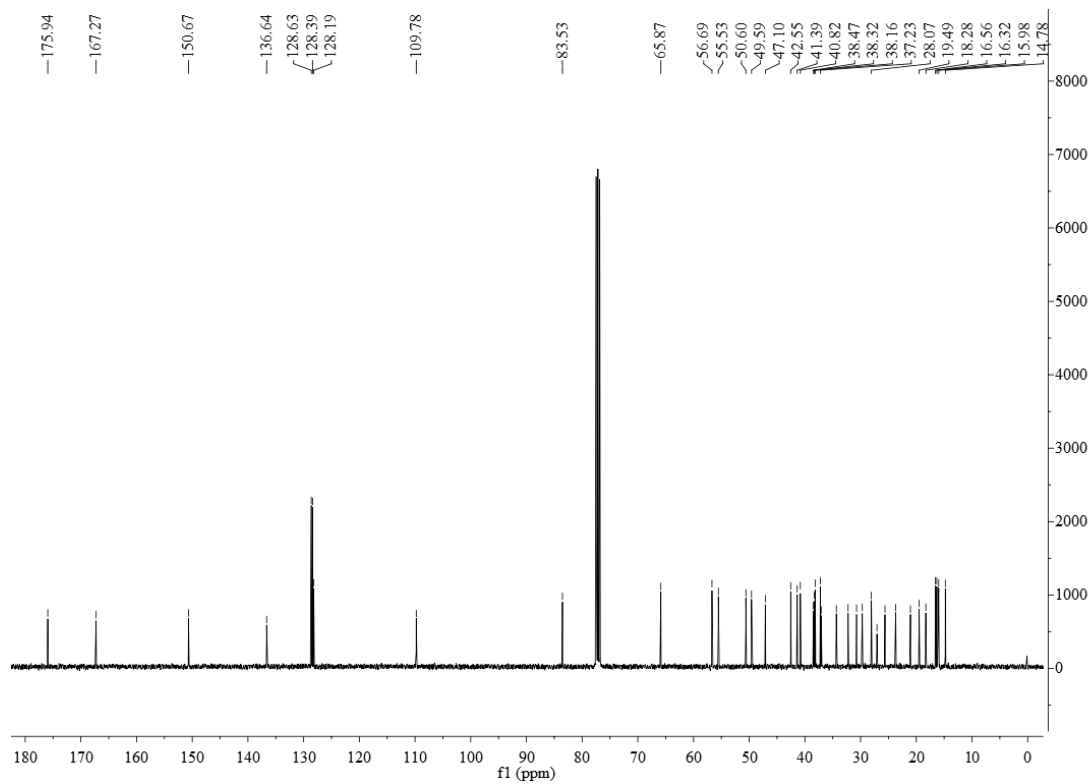

## Compound 11a

### $^1\text{H}$ -NMR spectra of Compound 11a

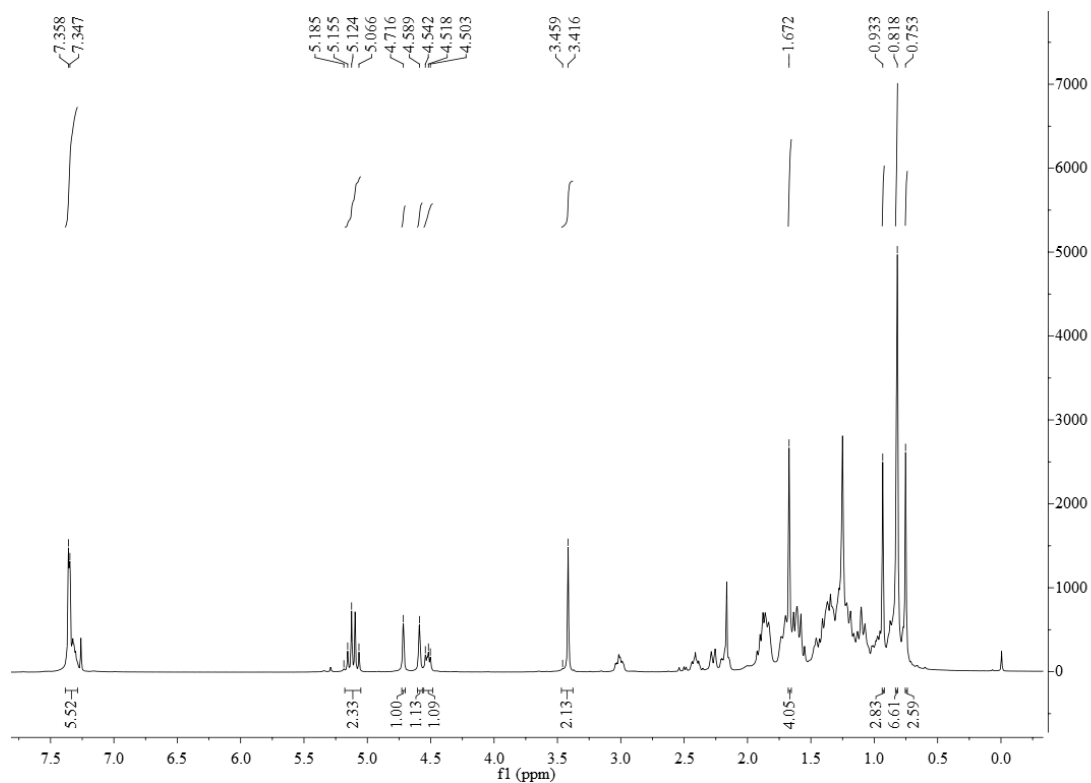

### $^{13}\text{C}$ -NMR spectra of Compound 11a

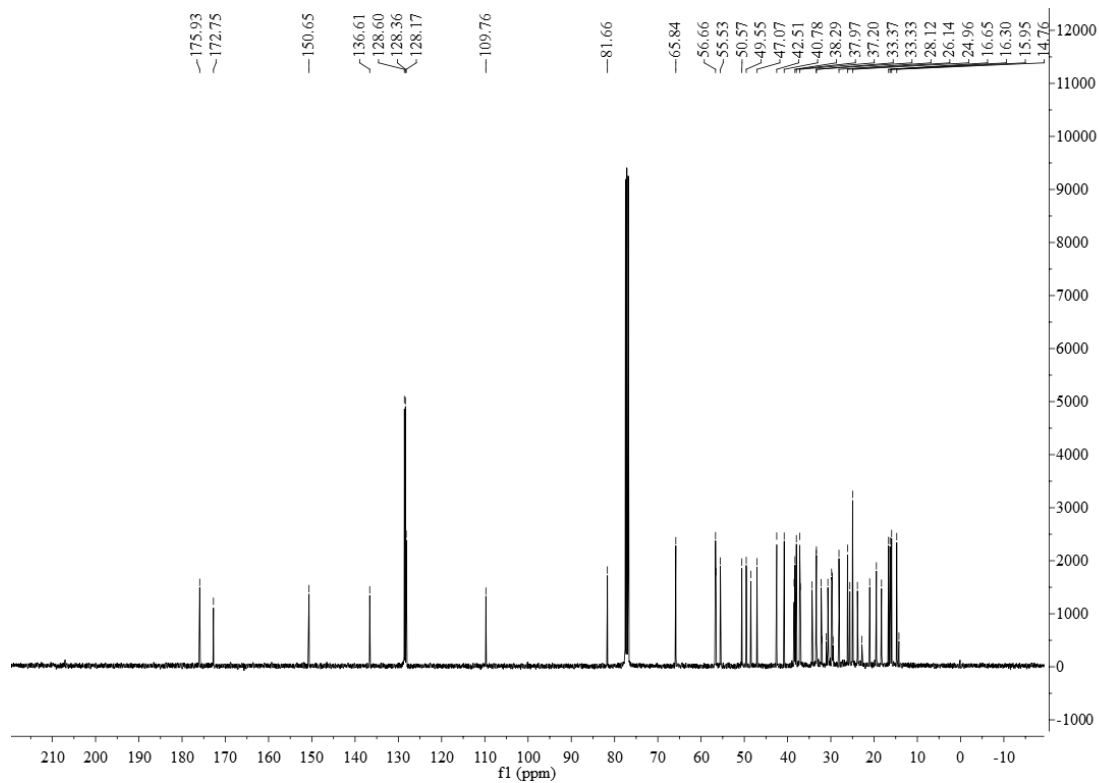

## Compound 11b

### $^1\text{H}$ -NMR spectra of Compound 11b

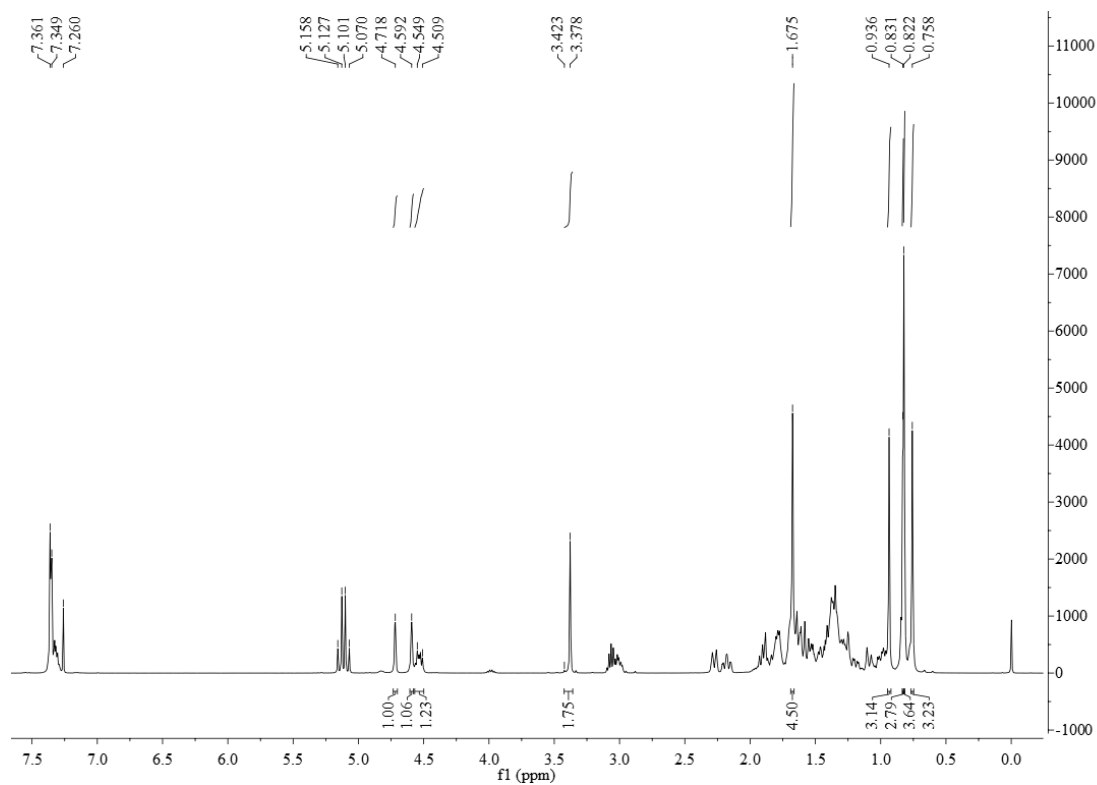

### $^{13}\text{C}$ -NMR spectra of Compound 11b

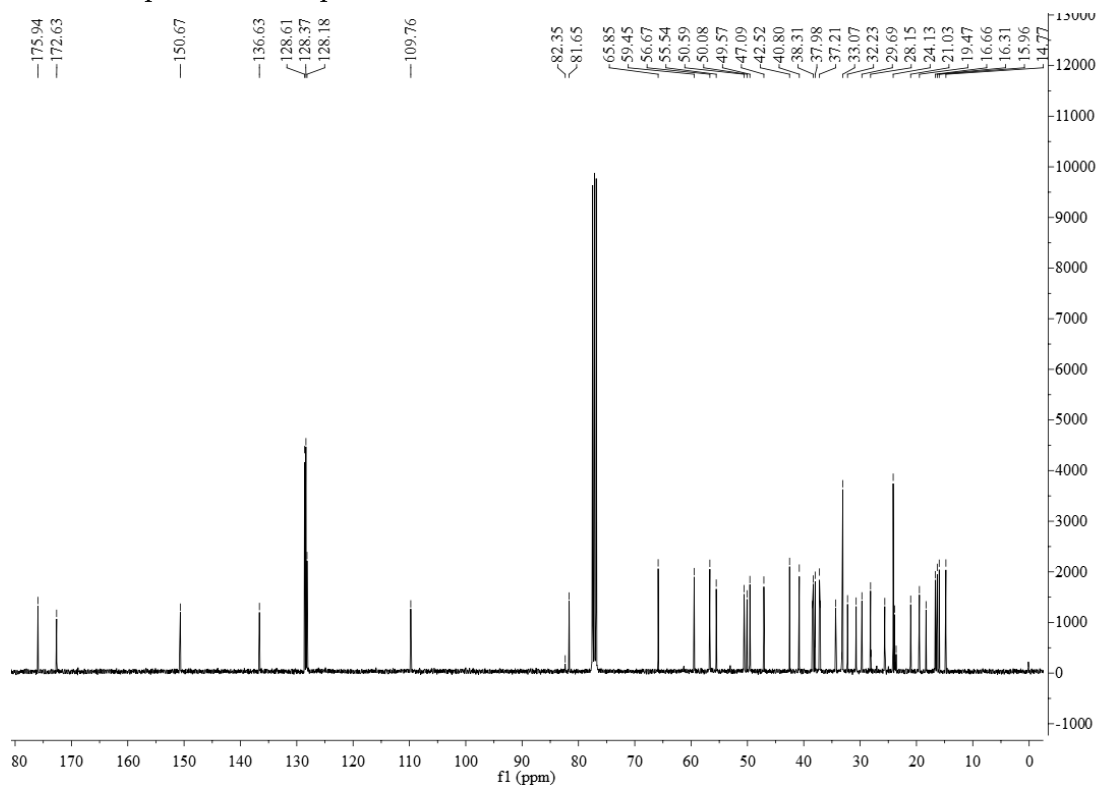

## Compound 11c

### $^1\text{H}$ -NMR spectra of Compound 11c

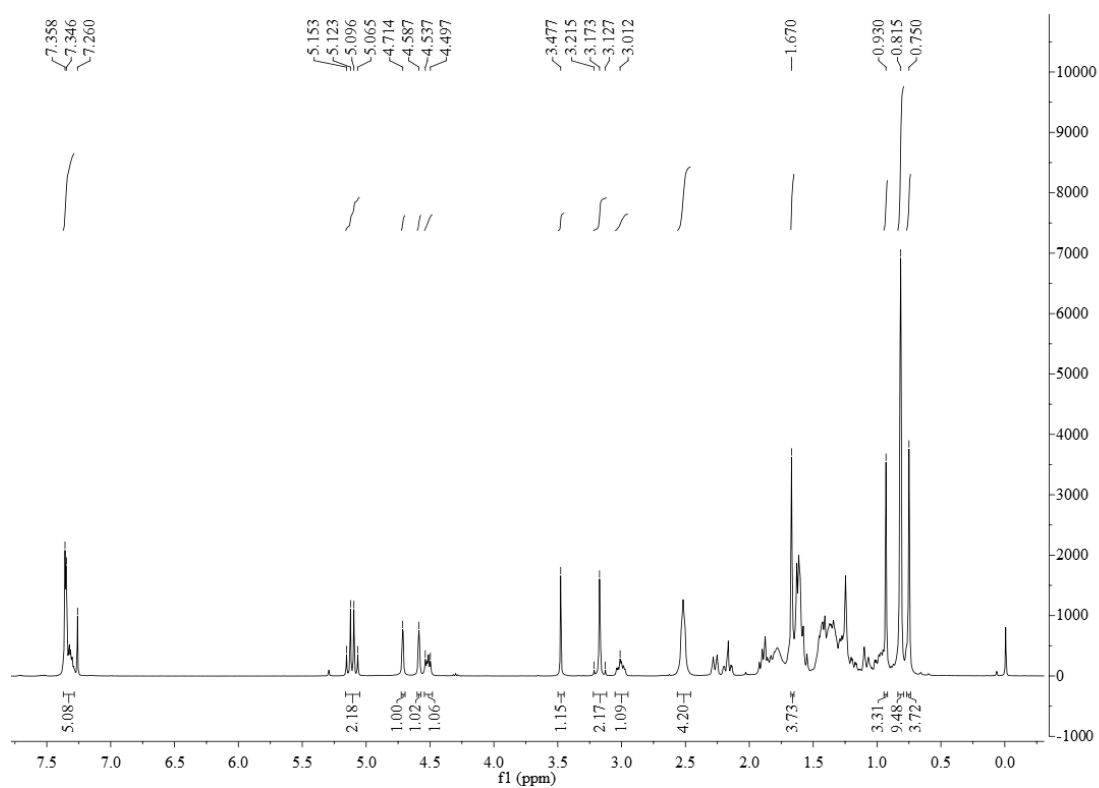

### $^{13}\text{C}$ -NMR spectra of Compound 11c

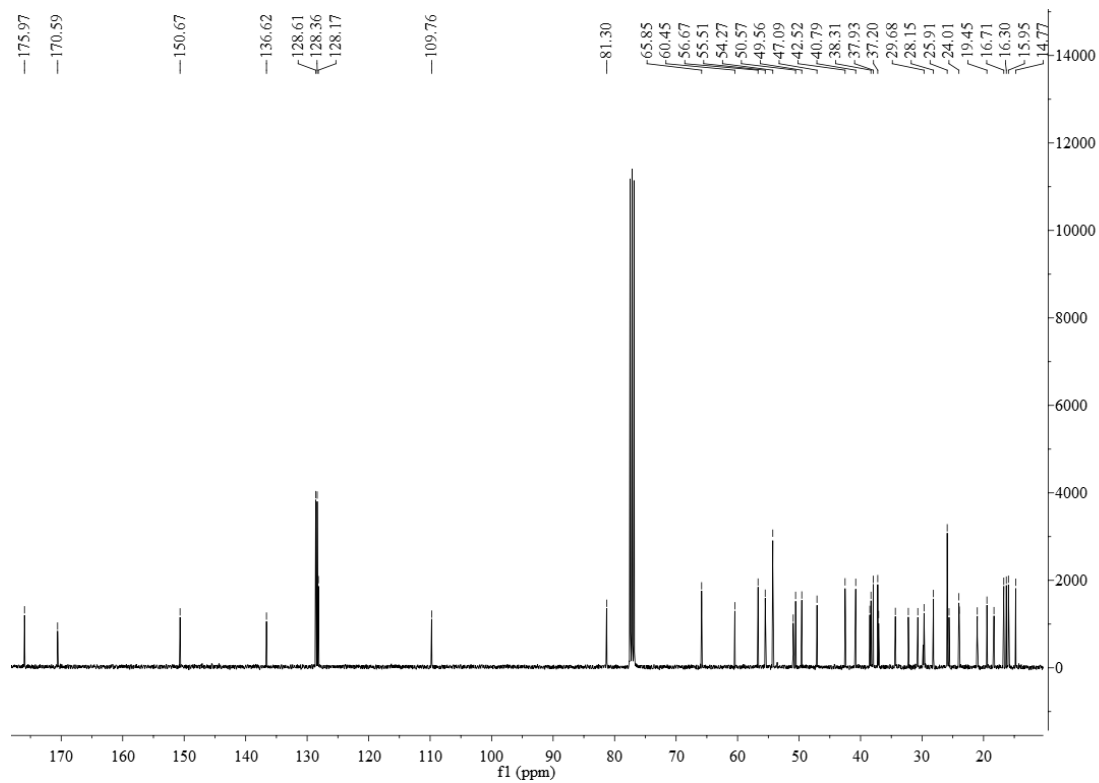

## Compound 11d

### $^1\text{H}$ -NMR spectra of Compound 11d

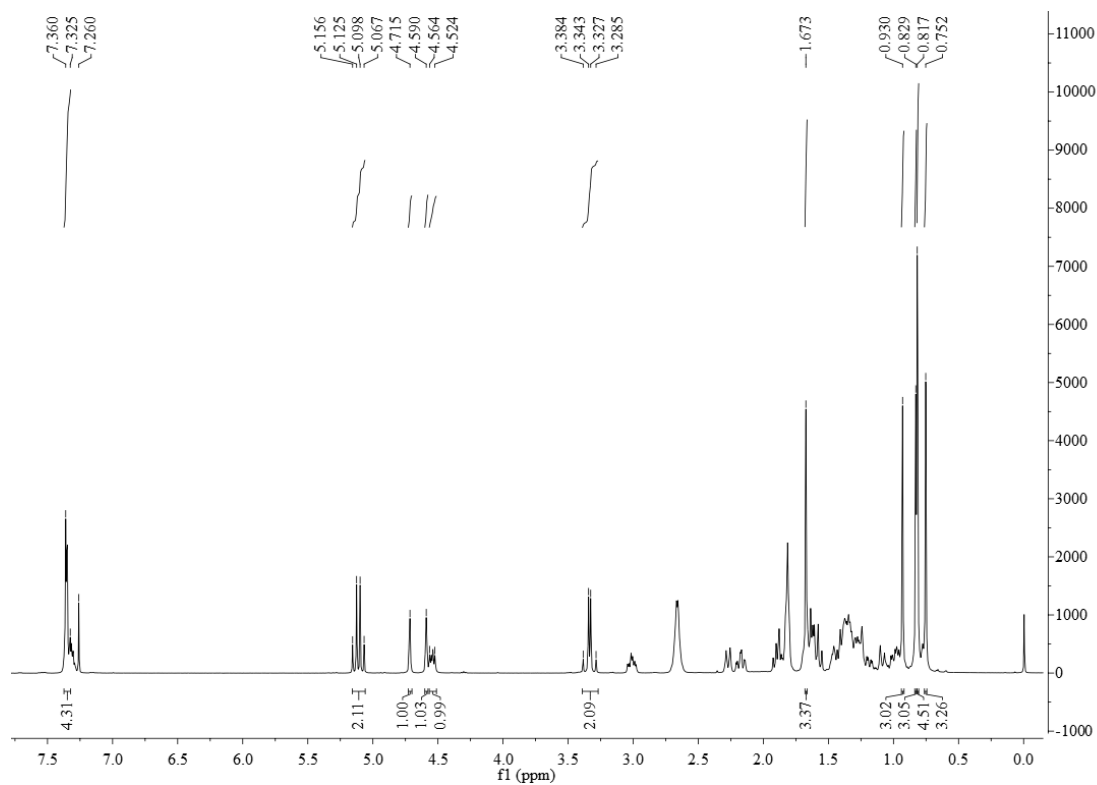

### $^{13}\text{C}$ -NMR spectra of Compound 11d

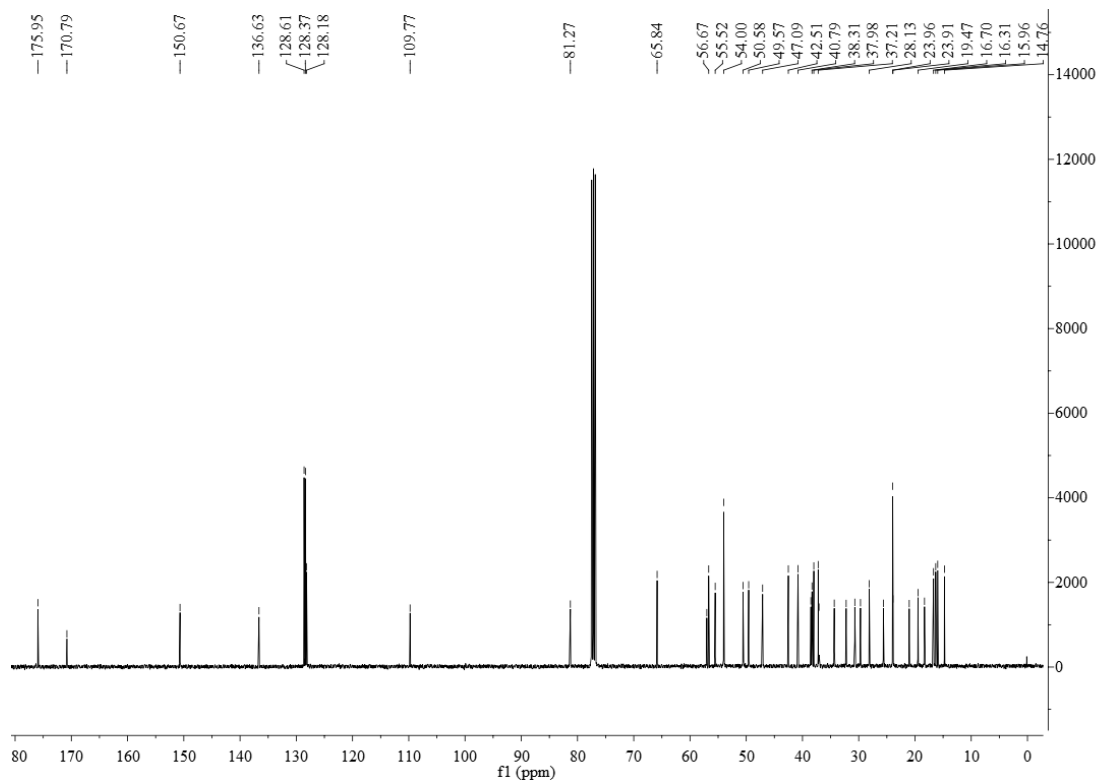



## Compound 11e

### $^1\text{H}$ -NMR spectra of Compound 11e

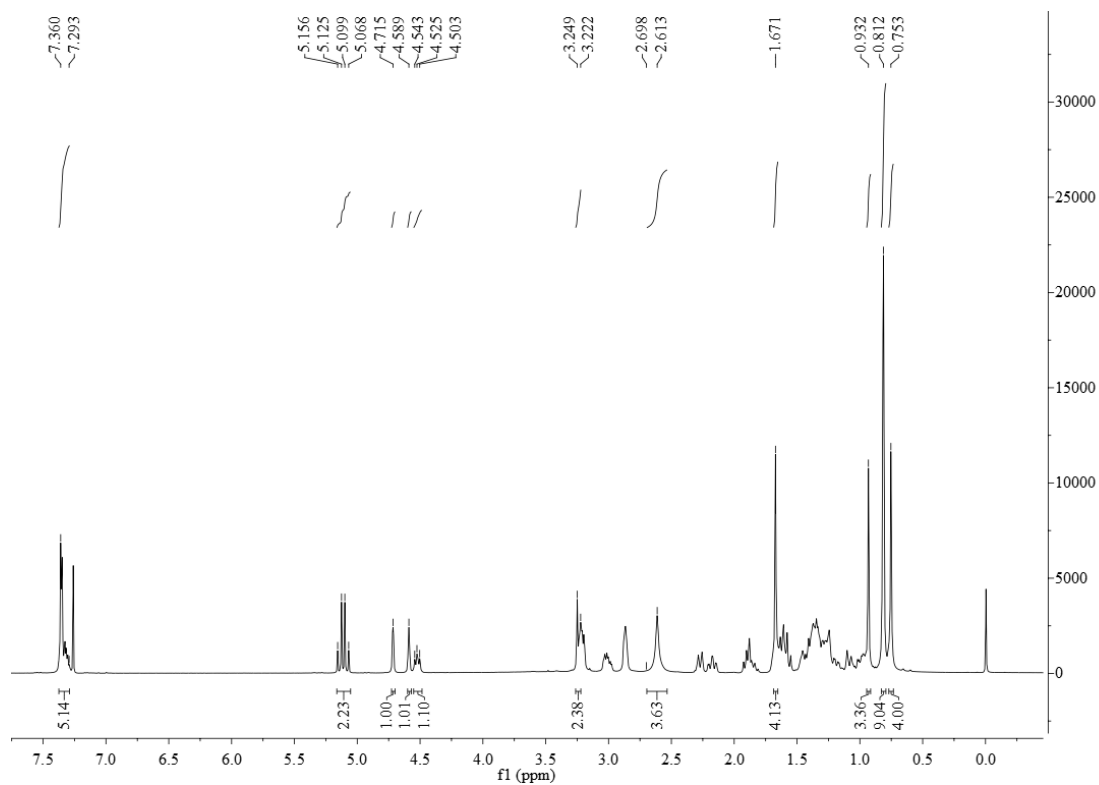

### $^{13}\text{C}$ -NMR spectra of Compound 11e

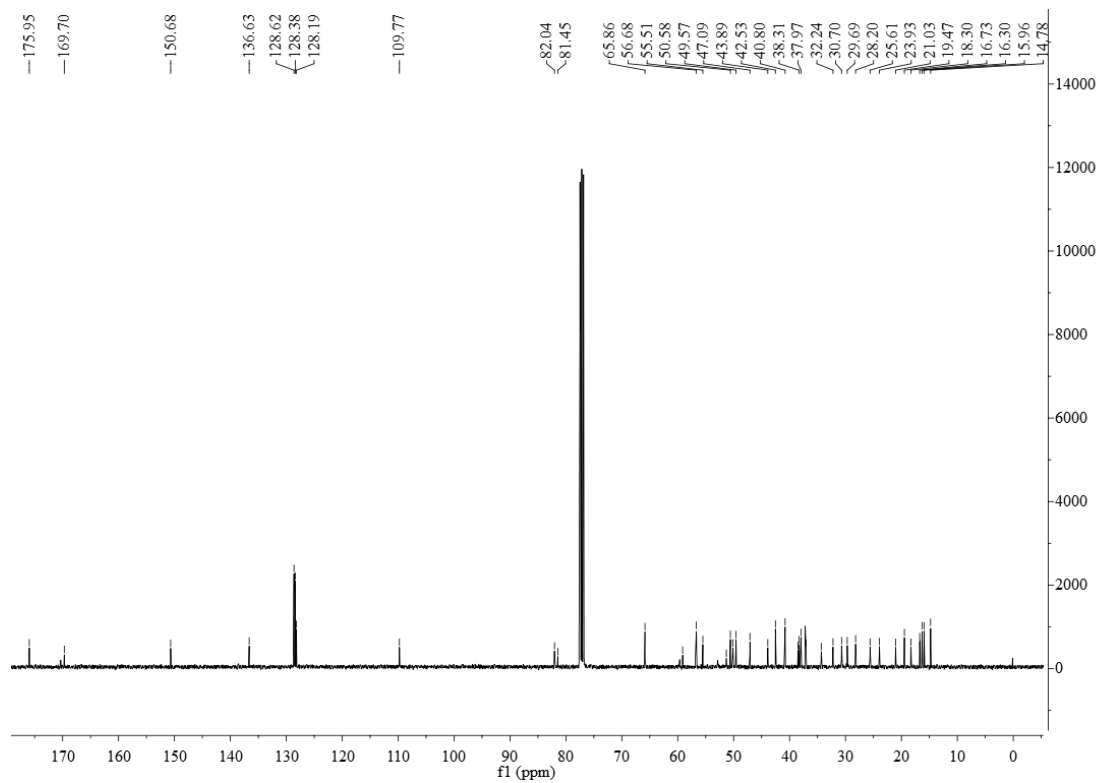

Supplement: s1 [file s1]
